1 **The evolving systemic biomarker milieu in obese ZSF1 rat model of human**  
2 **cardiometabolic syndrome: Characterization of the model and**  
3 **cardioprotective effect of GDF15**

4 **Short title:** Rat model for effects of GDF15 on human biomarkers of cardiometabolic  
5 syndrome

6

7 Marina Stolina<sup>1</sup>, Xin Luo<sup>2</sup>, Denise Dwyer<sup>1</sup>, Chun-Ya Han<sup>1</sup>, Rhonda Chen<sup>3</sup>, Ying Zhang<sup>3</sup>,  
8 YuMei Xiong<sup>3</sup>, Yinhong Chen<sup>3</sup>, Jun Yin<sup>2</sup>, Brandon Ason<sup>3</sup>, Clarence Hale<sup>1</sup>, Murielle M.  
9 Véniant<sup>1\*</sup>

10 <sup>1</sup> Amgen Research, Department of Cardiometabolic, Thousand Oaks, California, United States  
11 of America

12 <sup>2</sup> Amgen Research, Genome Analysis Unit, San Francisco, California, United States of  
13 America

14 <sup>3</sup> Amgen Research, Department of Cardiometabolic, San Francisco, California, United States  
15 of America

16 \*Corresponding author Email: [mveniant@amgen.com](mailto:mveniant@amgen.com) (MMV)

17

18 **Abstract**

19 Cardiometabolic syndrome has become a global health issue. Heart failure is a common  
20 comorbidity of cardiometabolic syndrome. Successful drug development to prevent  
21 cardiometabolic syndrome and associated comorbidities requires preclinical models predictive  
22 of human conditions. To characterize the heart failure component of cardiometabolic

23 syndrome, cardiometabolic, metabolic, and renal biomarkers were evaluated in obese and lean  
24 ZSF1 20- to 22-week-old male rats. Cardiac function, exercise capacity, and left ventricular  
25 gene expression were also analyzed. Obese ZSF1 rats exhibited multiple features of human  
26 cardiometabolic syndrome by pathological changes in systemic renal, metabolic, and  
27 cardiovascular disease circulating biomarkers. Hemodynamic assessment, echocardiography,  
28 and decreased exercise capacity confirmed heart failure with preserved ejection fraction. RNA-  
29 seq results demonstrated changes in left ventricular gene expression associated with fatty acid  
30 and branched chain amino acid metabolism, cardiomyopathy, cardiac hypertrophy, and heart  
31 failure. Twelve weeks of growth differentiation factor 15 (GDF15) treatment significantly  
32 decreased body weight, food intake, blood glucose, and triglycerides and improved exercise  
33 capacity in obese ZSF1 males. Systemic cardiovascular injury markers were significantly  
34 lower in GDF15-treated obese ZSF1 rats. Obese ZSF1 male rats represent a preclinical model  
35 for human cardiometabolic syndrome with established heart failure with preserved ejection  
36 fraction. GDF15 treatment mediated dietary response and demonstrated a cardioprotective  
37 effect in obese ZSF1 rats.

## 38 Introduction

39           Cardiometabolic syndrome (CMS)—a condition that encompasses impaired  
40 metabolism (insulin resistance [IR], impaired glucose tolerance), dyslipidemia, hypertension,  
41 renal dysfunction, central obesity, and heart failure (HF)—is now recognized as a disease by  
42 the World Health Organization (WHO) and the American Society of Endocrinology [1].  
43 Obesity and diabetes mellitus comorbidities are associated with progressive left ventricular  
44 (LV) remodeling and dysfunction. Also, these comorbidities are commonly observed in HF  
45 with preserved ejection fraction (HFpEF) [2]. Results from a recent epidemiological study  
46 (cohort of 3.5 million individuals) demonstrated an incremental increase in the hazard ratio  
47 (HR) for HF; HRs were 1.8 in normal weight individuals with three metabolic abnormalities,  
48 2.1 in overweight individuals with three metabolic abnormalities, and up to 3.9 in obese  
49 individuals with three metabolic abnormalities. Incidence of HFpEF, which currently  
50 represents approximately 50% of all HF cases, continues to rise and its prognosis fails to  
51 improve partly due to the lack of therapies available to treat this disease [3].

52           An important step in the development of novel therapeutic agents against CMS is the  
53 establishment of a preclinical model that represents a cluster of cardiometabolic disturbances  
54 that are similar to those of the human condition. The obese ZSF1 rat model (generated by  
55 crossing lean, non-hypertensive, female Zucker diabetic fatty rats [ZDF, *+/fa*] with lean,  
56 spontaneously hypertensive, HF-prone male rats [SHHF/Mcc, *+/facp*]) [4] exhibits features and  
57 complications that resemble what is observed in human CMS [5, 6]. Twenty-week-old obese  
58 ZSF1 male rats developed diastolic dysfunction based on prolonged  $\tau$  and elevated  
59 end-diastolic pressure-volume relationship (EDPVR), and showed exercise intolerance, which  
60 is an important feature of human HFpEF [7]. Although both lean and obese ZSF1 rats, by  
61 inheritance of a hypertensive gene, showed elevated blood pressure [4], only 20-week-old

62 obese ZSF1 males demonstrated LV hypertrophy, left atrial (LA) dilation, and increased  
63 myocardial stiffness due to myofilament changes [8].

64 Growth differentiation factor 15 (GDF15), also called macrophage inhibitory cytokine  
65 (MIC-1), is a distant member of the transforming growth factor  $\beta$  (TGF- $\beta$ ) superfamily.  
66 GDF15 is a homodimeric secreted protein with a mass of 25 kDa [9, 10]. Circulating levels  
67 are increased in humans with metabolic syndrome [11] and in those with increased risk of  
68 cardiovascular disease (CVD) [12, 13]. Recently published studies in obese preclinical models  
69 demonstrated an aversive dietary response to GDF15 treatment, leading to an improvement in  
70 metabolic parameters. Thus, daily injections of GDF15 to mice for 14 days to 21 weeks  
71 resulted in significantly reduced body weight and food intake, increased energy expenditure,  
72 improved glucose tolerance, and reduced inflammatory cytokines [14]. Administration of  
73 human GDF15 to rodents via an adenovirus system and to obese monkeys via protein injections  
74 led to body weight loss and an improved metabolic profile [15]. Treatment of obese mice with  
75 a human GDF15-Fc fusion protein (Fc-GDF15) led to reduced appetite and body weight and a  
76 shift of metabolic parameters toward lipid oxidation [15-18]. Weekly administration of  
77 Fc-GDF15 to obese cynomolgus monkeys for 28–42 days resulted in significantly reduced  
78 body weight and food consumption, lower serum triglyceride levels, and improved serum  
79 insulin [15, 19]. To date, GDF15 is shown to have mediated aversive dietary response,  
80 influenced the governance of systemic energy balance, and prevented obesity through  
81 enhanced thermogenesis and oxidative metabolism [20, 21].

82 While impaired metabolism, LV hypertrophy, LA dilation, increased myocardial  
83 stiffness, and decreased exercise capacity of obese ZSF1 males have been published in several  
84 separate scientific reports [5, 8, 22], the obesity-induced changes in systemic cardiovascular  
85 protein biomarkers and LV gene expression have not been reported. In the current study, we  
86 performed a comprehensive comparative evaluation of 20- to 22-week-old male lean and obese

87 ZSF1 rats by systematically studying the metabolic, renal, and cardiovascular protein  
88 biomarkers. We also used echocardiography, invasive hemodynamic assessment, exercise  
89 capacity assessment, and LV gene expression analysis to complete the characterization of this  
90 animal model. Additionally, we investigated whether 12 weeks of treatment with Fc-GDF15  
91 in 22-week-old obese ZSF1 males would result in decreased body weight and food intake and  
92 improvement in metabolic profile, similar to prior non-clinical studies [15, 18], and also  
93 whether a cardioprotective effect could be demonstrated by improving exercise capacity and  
94 circulating levels of cardiovascular protein biomarkers. Overall, our study suggests that obese  
95 ZSF1 male rats represent a preclinical model for human cardiometabolic syndrome with  
96 established HFpEF.

## 97 **Materials and methods**

### 98 **Animal welfare and husbandry**

99 All studies were performed in accordance with the Institutional Animal Care and Use  
100 Committee guidelines and complied with the Final Rules of the Animal Welfare Act  
101 regulations (Code of Federal Regulations, Title 9), the Public Health Service Policy on Humane  
102 Care and Use of Laboratory Animals in the Office of Laboratory Animal Welfare (2002), and  
103 the Guide for the Care and Use of Laboratory Animals from the National Research Council  
104 (1996). All rodent studies were conducted at Amgen Inc and were approved by the Amgen  
105 Institutional Animal Care and Use Committee (IACUC). Animals were maintained in rooms  
106 with a 12-hour light/dark cycle, temperature of 22°C, and humidity of 30–70%. Animals had  
107 free access to food and water and were maintained on standard rodent chow unless otherwise  
108 indicated. Rats were single-housed at Amgen’s Association for Assessment and Accreditation  
109 of Laboratory Animal Care (AAALAC)–accredited facility in filter-top cages on corn cob  
110 bedding, with ad libitum access to pelleted feed (Harlan/Teklad Irradiated Global Soy Protein-

111 Free Extruded Rodent Diet 2920x; Harlan, Madison, WI, USA) and reverse-osmosis purified  
112 water via an automatic watering system. Animals were maintained in pathogen-free conditions  
113 with a 12-hour light/dark cycle and had access to enrichment opportunities.

## 114 **In vivo study design for characterization of obese ZSF1 rat as a** 115 **preclinical model of human CMS**

116 Eighteen-week-old lean ZSF1 male (strain 379,  $n = 14$ ) and obese ZSF1 (strain 378,  
117  $n = 14$ ) rats were purchased from Charles River Laboratories (Kingston, NY, USA) and  
118 single-housed at Amgen's AAALAC-accredited facility. After 2 weeks of acclimation, both  
119 groups of rats ( $n = 8$  per group) were subjected to blood collection via tail vein,  
120 echocardiography, hemodynamic assessment, and evaluation of exercise endurance (time and  
121 distance) using a treadmill. A separate cohort from the same batch of acclimated obese ZSF1  
122 ( $n = 6$ ) and lean ZSF1 ( $n = 6$ ) rats was subjected to heart isolation, RNA extraction, and gene  
123 expression analysis.

## 124 **In vivo study design for the evaluation of Fc-GDF15 treatment** 125 **effect on CMS-specific biomarkers in obese ZSF1 rats**

126 Twenty-week-old obese ZSF1 male rats (strain 378,  $n = 30$ ) were purchased from  
127 Charles River Laboratories, single-housed at Amgen's AAALAC-accredited facility, and  
128 acclimated for 2 weeks. At 22 weeks of age, baseline blood collection (for metabolic biomarker  
129 evaluation) and body weight assessment were performed for every animal. Twenty-four hours  
130 later, the rats were randomized into two groups and injected subcutaneously once a week for  
131 12 weeks with either A5.2Su buffer (vehicle group,  $n = 15$ ) or 1.5 mg/kg DhCpmFc-(G4S)4-  
132 hGDF15 [15] (Fc-GDF15 group,  $n = 15$ ). For the duration of the study, every rat was subjected  
133 to weekly blood collection, food intake, and body weight assessments. At the end of the study,

134 rats from both treatment groups were subjected to echocardiography, hemodynamic  
135 assessment, and evaluation of exercise endurance (time and distance) using treadmill  
136 equipment.

## 137 **Cardiovascular, kidney injury, and metabolic biomarkers in** 138 **serum/plasma**

139 Animals were fasted for 4 hours prior to blood collection. The first 0.5 mL aliquot of  
140 whole blood was collected from the tail vein into serum separator tubes (Microtainer, Becton  
141 Dickinson, Franklin Lakes, NJ, USA), and the second 0.5 mL aliquot of whole blood into  
142 ethylenediaminetetraacetic acid (EDTA) plasma separation tubes (Microtainer, Becton  
143 Dickinson, Franklin Lakes, NJ). Separated serum/plasma was aliquoted and stored at  $-80^{\circ}\text{C}$ .  
144 Blood glucose levels were measured using AlphaTrak 2 glucose strip (Abbott Laboratories,  
145 Lake Bluff, IL, USA). Blood insulin was evaluated using a rat insulin enzyme-linked  
146 immunosorbent assay (ELISA) kit (Alpco, Salem, NH, USA). Serum triglyceride and  
147 cholesterol levels were measured weekly by triglyceride quantitation kits (Fisher Diagnostics,  
148 Middletown, VA, USA). Systemic levels of GDF15 (R&D Systems, Minneapolis, MN, USA)  
149 and proinsulin (Mercodia, Uppsala, Sweden) in serum/plasma of 20-week-old ZSF1 male rats  
150 were evaluated by commercial ELISAs. A limited array of circulating metabolic hormones  
151 (amylin [active], C-peptide 2, ghrelin [active], gastric inhibitory polypeptide [GIP, total],  
152 glucagon-like peptide 1 [GLP-1, active], glucagon, interleukin-6 [IL-6], leptin, pancreatic  
153 polypeptide [PP], and peptide YY [PYY]) was assessed in serum/plasma collected from lean  
154 and obese ZSF1 rats at the age of 20 weeks by rat-specific MILLIplex kit (Millipore, Billerica,  
155 MA, USA). Kidney injury markers KIM-1 and NGAL were evaluated in serum from 20-week-  
156 old lean and obese ZSF1 rats by multiplex MILLIplex kits (Millipore). Serum NT-proBNP  
157 and rat cardiac injury markers (fatty-acid-binding protein 3 [FABP3] and myosin light chain 3

158 [My13]) were measured by using rat-specific single-plex or multiplex commercial assays from  
159 Meso Scale Diagnostics (Rockville, MD, USA). Systemic levels of vascular markers were  
160 evaluated at the end of the Fc-GDF15 and vehicle treatment of obese ZSF1 rats by using  
161 multiplex MILLIplex kits (Millipore). The rat vascular injury panels included VEGF, MCP1,  
162 TIMP1, TNF $\alpha$ , vWF, adiponectin, sE-selectin, and sICAM1. Systemic aldosterone levels were  
163 measured by enzyme immunoassay (m/r/h Aldosterone ELISA; Enzo Life Sciences,  
164 Farmingdale, NY, USA) and serum osteopontin (OPN) by Rat Single Plex Kit (Millipore). All  
165 the assays were performed in accordance with manufacturer protocols.

## 166 **RNA isolation and sequencing analysis of left heart**

167 At scheduled necropsy, LA and LV of the heart were washed briefly in RNase-free  
168 saline, placed in cryo-tubes, snap-frozen in liquid nitrogen, and stored at  $-80^{\circ}\text{C}$ . Samples were  
169 subjected to dry pulverization before being homogenized in buffer (350  $\mu\text{L}$  of Qiagen RLT  
170 buffer with 1%  $\beta$ -mercaptoethanol; Qiagen, Germantown, MD, USA). The homogenate was  
171 transferred to an RNase-free 1.5 mL centrifuge tube, after which 590  $\mu\text{L}$  RNase-free water and  
172 10  $\mu\text{L}$  of a 20 mg/mL proteinase K solution were added. Samples were incubated at  $55^{\circ}\text{C}$  for  
173 10 minutes, centrifuged, and the supernatant collected. RNA was then extracted using RNeasy  
174 Micro Kit (Qiagen) with on-column DNase treatment (Qiagen) according to the manufacturer's  
175 instructions. RNA concentration and integrity were assessed using a Bioanalyzer (Agilent,  
176 Santa Clara, CA, USA). Samples with  $\geq 80$  ng total RNA and RNA integrity numbers (RIN)  
177  $\geq 7$  were used for sequencing. Raw reads were processed using OmicSoft (Cary, NC, USA)  
178 Array Studio software (Oshell.exe v10.0) [23]. The expression level was expressed as  
179 fragments per kilobase per million quantile normalized (FPKQ) values, which were generated  
180 using OmicSoft's implementation of the RSEM algorithm and normalized using upper-quartile  
181 normalization [24].



## 182 **Differential expression and pathway analysis**

183 Differential expression analysis was performed using DESeq2 v1.10.1 for obese vs lean  
184 ZSF1 LV comparison [25], and gene expression fold changes were calculated using FPKQ  
185 values. Genes with Benjamini-Hochberg corrected  $p$ -value  $< 0.05$  and fold change between  
186 the two conditions  $\geq 1.5$  or  $\leq 0.67$  were selected as significantly differentially expressed genes  
187 (DEGs).

188 The analysis of the genes that have human homologue and are abundant in human heart  
189 (top three out of 45 tissue roll-ups with median FPKQ  $\geq 1$ ) was based on Genotype-Tissue  
190 Expression (GTEx) data [26]. Heart abundant altered genes were visualized in a graphic  
191 heatmap using the ComplexHeatmap R package [27]. All the DEGs and heart abundant DEGs  
192 were further annotated by ingenuity pathway analysis (IPA; QIAGEN, Redwood City, CA,  
193 USA). Metabolic signaling pathway enrichment was done on the significantly DEGs by an  
194 adjusted  $p$ -value cutoff of 0.05 by IPA. Gene expression enrichment in diseases was analyzed  
195 by using Medical Subject Headings (MeSH) terms using the meshes R package [28]. Dotplots  
196 and heatplots were generated with clusterProfiler [29].

## 197 **Echocardiography**

198 Non-invasive echocardiograms were obtained on anesthetized rats (isoflurane, 3%  
199 induction, 1.5% maintenance) using a Vevo 2100 imaging system (FUJIFILM VisualSonics,  
200 Inc, Toronto, Canada). Animals were shaved and placed on a platform, and a thermo-couple  
201 probe was used to assess body temperature and to adjust the temperature of the platform to  
202 maintain normothermia. Sonography gel was applied on the thorax. Two-dimensional targeted  
203 B-mode and M-mode imaging was obtained from the long-axis and short-axis views at the level  
204 of the papillary muscle. Coronary flow was measured by pulsed-wave (PW) Doppler, and  
205 movement of the LV wall was measured by tissue Doppler by placing the probe to the chest

206 and focusing the image on the ventricular wall region to achieve an apical four-chamber view.  
207 Animals were subsequently wiped clean of sonography gel, allowed to achieve consciousness,  
208 and returned to their home cage.

## 209 **Invasive hemodynamic assessment**

210 Animals underwent general anesthesia using ketamine/diazepam (intraperitoneal)  
211 injection (80–100 mg/kg ketamine; 5–10 mg/kg diazepam) followed by a ketamine boost (10–  
212 20 mg/kg) as necessary to maintain the anesthesia plane. Anesthetized animals had the surgical  
213 sites shaved with a small animal shear. Animals were then placed on a heated surgical platform,  
214 and body temperature was monitored and maintained throughout the study via a rectal probe.  
215 Arterial pressure was measured via femoral artery catheterization (SPR-839; Millar, Houston,  
216 TX, USA). An incision in the medial aspect of the leg was made, and the fat overlaying the  
217 femoral vessels and femoral nerve in the area between the abdominal wall and the upper leg  
218 was gently teased apart using forceps or Q-tips. The fascia overlying the artery, nerve, and  
219 vein was removed. The artery was isolated and ligated by a distal suture, and a loose tie was  
220 held in place using a hemostat. A microvessel clip or suture was placed on the artery near the  
221 abdominal wall, and a small incision was made into the vessel using Vannas micro-scissors or  
222 a 25-gauge needle. The clip was released by one hand, and the Millar catheter was advanced  
223 quickly into the femoral artery, followed by the tightening of the proximal suture to prevent  
224 blood loss. Pressure was then recorded. LV pressure and volume were measured via carotid  
225 artery catheterization (SPR-838; Millar). The right carotid artery was isolated, and a suture  
226 was tied around the vessel approximately 0.25 cm below the skull base to disrupt blood flow.  
227 A suture was placed around the artery near the rib cage and held in place using a hemostat. A  
228 small incision was made into the vessel using Vannas micro-scissors or a 25-gauge needle.  
229 The clip was released by one hand, and the Millar catheter was advanced quickly into the  
230 carotid artery, followed by the tightening of the proximal suture to prevent blood loss. The

231 catheter was advanced until it entered the LV for pressure-volume loop measurement. Animals  
232 were euthanized under anesthesia after completion of the data acquisition.

## 233 **Treadmill assessment**

234 Rats were subjected to evaluation of exercise endurance (time and distance) using a  
235 treadmill. Endurance exercise performance was estimated using two parameters: run duration  
236 (minutes) and distance (meters). Oxygen consumption, an indicator of exercise capacity, was  
237 measured by monitoring the O<sub>2</sub> concentration of expired air. Peak chamber oxygen decrement,  
238 which usually occurs just prior to exhaustion, was used to calculate and define the animal's  
239 peak volume of oxygen consumption (VO<sub>2</sub>). The contribution of anaerobic metabolism to  
240 overall energy production during exercise was estimated by calculating the respiratory  
241 exchange ratio (RER), the ratio of VO<sub>2</sub> to VCO<sub>2</sub> (the amount of CO<sub>2</sub> within the chamber just  
242 prior to exhaustion). Rats were initially familiarized to the motorized rodent treadmill  
243 (Columbus Instruments, Columbus, OH, USA) for 5 days before completing the exercise  
244 performance test. Rats were placed on the treadmill and allowed to adapt to the surroundings  
245 for 2–5 minutes before starting. Familiarization runs consisted of 10 minutes of running on an  
246 incline of 10° at a speed of 12 m/min. For the treadmill challenge, rats were placed on the  
247 treadmill and allowed to adapt to the surroundings for 2–5 minutes before starting. The  
248 treadmill was initiated at a speed of 8.5 m/min with a 0° incline. After 3 minutes, the speed  
249 and incline were raised up to 10 m/min. The incline was subsequently increased progressively  
250 by 2.5 m/min every 3 minutes. The incline was progressively increased by 5° every 9 minutes  
251 to a maximum of up to 30°. Exercise continued until exhaustion, which is defined as the  
252 inability to maintain running speed despite repeated contact with the electric grid (three shocks  
253 in less than 15 seconds).

## 254 **Statistical analysis**

255 Results for serum protein biomarkers, hemodynamic assessments, echocardiography,  
256 and systemic metabolic parameters are expressed as mean  $\pm$  standard error of the mean (SEM).  
257 Differences between the two groups were examined between lean ZSF1 and obese ZSF1 rats  
258 of the same age or at the end of the Fc-GDF15 treatment (week 12) between vehicle-treated  
259 and Fc-GDF15-treated obese ZSF1 rats. Unpaired Student's *t* test was performed to evaluate  
260 the statistical significance between the groups. A value of  $p < 0.05$  was used to determine  
261 statistical significance. Stars (\*) indicate significance: \*  $p < 0.05$ , \*\*  $p < 0.01$ , \*\*\*  $p < 0.001$ ,  
262 \*\*\*\*  $p < 0.0001$ . All the statistical analysis was performed by using GraphPad Prism (Version 7.04,  
263 GraphPad Software, San Diego, CA).

## 264 Results

### 265 At the age of 20 weeks, obese ZSF1 male rats exhibited increased 266 body weight and impaired metabolism

267 We have confirmed previous reports [4] and demonstrated that 20-week-old obese  
268 ZSF1 rats exhibit impaired markers of metabolism (S1 Table; Fig 1), including elevated body  
269 weight (38% increase vs lean group;  $p < 0.0001$ ) and significantly increased blood glucose  
270 (1.6-fold;  $p = 0.0060$ ), serum insulin (14.7-fold;  $p = 0.0019$ ), cholesterol (2.9-fold;  $p < 0.0001$ ),  
271 and triglyceride (15-fold;  $p < 0.0001$ ) levels relative to lean ZSF1 littermate controls.  
272 Significant decrease in serum adiponectin from  $2.6 \pm 0.09$   $\mu\text{g/mL}$  in lean ZSF1 serum to  $1.9$   
273  $\pm 0.05$   $\mu\text{g/mL}$  in obese ZSF1 serum ( $p < 0.0001$ ) indicated deposition of newly formed fat and  
274 served as a reliable obesity biomarker.

275 **Fig 1. Obese ZSF1 male rats exhibited increased BW, glucose, insulin, cholesterol and**  
276 **triglycerides levels and decreased adiponectin and increased GDF15 levels.** Obese ZSF1  
277 male rats at the age of 20 weeks exhibited increased body weight (A), elevated blood glucose

278 (B), insulin (C), cholesterol (D), and triglyceride levels (E), decreased adiponectin (F), and  
279 increased growth differentiation factor 15 (GDF15) (G). Stars (\*) indicate significance ( $* p <$   
280  $0.05$ ,  $** p < 0.01$ ,  $*** p < 0.001$ ,  $**** p < 0.0001$ ) by unpaired two-tailed  $t$  test.

## 281 **Twenty-week-old obese ZSF1 male rats demonstrated pancreatic** 282 **and renal dysfunction**

283 Since the array of biomarker changes relevant to the progression and establishment of  
284 CMS in humans includes type 2 diabetes (T2D) and renal impairment, we evaluated systemic  
285 levels of major pancreatic and kidney injury biomarkers in obese ZSF1 rats compared with  
286 their lean littermates (S1 Table). Twenty-week-old obese ZSF1 male rats demonstrated  
287 pancreatic dysfunction by showing a 2.7-fold elevation in systemic C-peptide, a 47-fold  
288 increase in proinsulin (Fig 2B), a 6.3-fold increase in serum active amylin (Fig 2C), and  
289 elevated glucagon ( $37.8 \pm 4.6$  pg/mL in obese ZSF1 vs  $25.8 \pm 2.5$  pg/mL in lean ZSF1  
290 littermates;  $p = 0.0388$ ; Fig 2D). Impaired renal function in the obese ZSF1 group was  
291 characterized with significantly increased serum kidney injury markers NGAL (1.5-fold vs lean  
292 ZSF1; Fig 2E), KIM-1 (2.2-fold vs lean ZSF1; Fig 2F), and clusterin (1.4-fold vs lean ZSF1;  
293 Fig 2G).

294 **Fig 2. Obese ZSF1 rats demonstrated pancreatic dysfunction and impaired renal**  
295 **function.** Obese ZSF1 rats show increased C-peptide (A), proinsulin (B), active amylin (C),  
296 and glucagon (D). Obese ZSF1 rats exhibit impaired renal function by showing increased  
297 serum levels of kidney injury markers NGAL (E), KIM-1 (F), and clusterin (G). Stars (\*)  
298 indicate significance ( $* p < 0.05$ ,  $** p < 0.01$ ,  $*** p < 0.001$ ,  $**** p < 0.0001$ ) by unpaired  
299 two-tailed  $t$  test.

300 **Obese ZSF1 male rats demonstrated impaired cardiac function**  
301 **and reduced exercise capacity at the age of 20–21 weeks**

302 The complete set of invasive hemodynamic assessment, echocardiography, and  
303 exercise capacity of 20- to 21-week-old lean and obese ZSF1 male rats is presented in S3 Table.  
304 The heart-to-brain weight ratios were significantly higher in obese ZSF1 rats than in lean ZSF1  
305 littermates (Fig 3A). Invasive hemodynamic assessment at 21 weeks for rats anesthetized with  
306 ketamine/diazepam showed an increased relaxation constant  $\tau$  (Fig 3B). Echocardiography  
307 at 20 weeks under isoflurane anesthesia revealed that obese ZSF1 rats exhibit a significant  
308 decrease in heart rate (Fig 3C), ratio of mitral peak velocity of early filling to early diastolic  
309 mitral annular velocity (E/E') (Fig 3D), and isovolumic relaxation time (IVRT) (Fig 3E), while  
310 maintaining a normal ejection fraction (Fig 3F). We further demonstrated that obese ZSF1 rats  
311 exhibit a limited exercise capacity with significantly shorter time to exhaustion (Fig 3H), lower  
312 peak  $\text{VO}_2$  (Fig 3I), and shorter distance (Fig 3G) following a treadmill exercise challenge.

313 **Fig 3. Obese ZSF1 rats exhibited diastolic dysfunction and decreased exercise capacity.**

314 The heart-to-brain weight ratio (by echocardiography) is increased in obese ZSF1 rats (A), and  
315 invasive hemodynamic assessment provides evidence of diastolic dysfunction by increased  $\tau$   
316 (B) when compared with lean ZSF1 rats. Echocardiography reveals that obese ZSF1 rats  
317 exhibit a decrease in heart rate (C) and diastolic dysfunction by increase in the E/E' ratio (D)  
318 and isovolumetric relaxation time (IVRT) (E), while % ejection fraction is not different from  
319 lean ZSF1 (F). Obese ZSF1 rats exhibit decreased exercise capacity as measured by distance  
320 (G), time (H), and peak  $\text{VO}_2$  (I). Stars (\*) indicate significance (\*  $p < 0.05$ , \*\*  $p < 0.01$ , \*\*\*  $p$   
321  $< 0.001$ , \*\*\*\*  $p < 0.0001$ ) by unpaired two-tailed  $t$  test.

322 **At 20 weeks of age, obese ZSF1 male rats exhibited significant**  
323 **changes in major systemic biomarkers of cardiovascular function.**

324 To evaluate the translational value of the obese ZSF1 rat model for human CMS, we  
325 next profiled major systemic CVD biomarkers (S2 Table; Fig 4A–4F) and compared the results  
326 with the gene expression of the same markers in the left heart of 20-week-old lean and obese  
327 ZSF1 male rats (Fig 4G and 4H). The array of systemic changes in CVD-related biomarkers  
328 included increased blood levels of hypertension marker aldosterone (Fig 4A), elevated FABP3,  
329 a biomarker of heart pathology (Fig 4B), and significantly increased vascular markers IL-16  
330 (Fig 4C) and ST2 (Fig 4D). Systemic concentration of NT-proBNP (Fig 4E) in obese ZSF1  
331 rats was significantly lower than in the lean rats, and OPN (Fig 4F) level in circulation was not  
332 different between lean and obese ZSF1 rats. Gene expression of the above markers in the left  
333 heart was not different between lean and obese ZSF1 rats for FABP3, IL-16, IL1RL1 (data not  
334 shown), and NPPB (NT-proBNP protein; Fig 4G), whereas the local SPP1 mRNA expression  
335 (OPN gene) in both LA and LV was significantly elevated in obese ZSF1 rats (Fig 4H).

336 **Fig 4. Twenty-week-old obese ZSF1 male rats exhibited cardiovascular dysfunction.**  
337 **obese ZSF1** show increased blood levels of aldosterone (A), fatty-acid-binding protein 3  
338 (FABP3; B), interleukin-16 (IL-16; C), and ST2 (D). In obese ZSF1 rats, systemic  
339 concentration of NT-proBNP (E) is lower compared with the lean cohort and osteopontin  
340 (OPN; F) level in circulation is not different between the two cohorts. The mRNA expression  
341 of NPPB (NT-proBNP protein; G) in left heart was not different between obese ZSF1 and lean  
342 ZSF1 groups, whereas the local SPP1 (OPN) expression in left atria (LA) and left ventricle  
343 (LV) (H) was significantly elevated in obese ZSF1 rats. Stars (\*) indicate significance (\*  $p <$   
344 0.05, \*\*  $p <$  0.01, \*\*\*  $p <$  0.001, \*\*\*\*  $p <$  0.0001) by unpaired two-tailed  $t$  test.

## 345 **CMS-related gene expression changes in the left heart of 20-week-** 346 **old male ZSF1 rats**

347 To characterize the transcriptional effects of obesity and metabolic dysfunction on the  
348 expression of left heart specific/abundant genes, RNA-seq was performed on LV isolated from  
349 20-week-old lean and obese ZSF1 male rats (Fig 5). Comparison of heart abundant protein  
350 coding gene expression levels in LV biopsies from lean and obese ZSF1 rats revealed a  
351 relatively small number of genotype-driven gene expression changes (Fig 5A): the expression  
352 of 56 genes was significantly increased ( $FC > 1.5$ ;  $p < 0.05$ ; S6 Table), and the expression of  
353 48 genes was significantly decreased ( $FC < 0.75$ ;  $p < 0.05$ ; S7 Table) in obese rats vs lean rats.  
354 The IPA pathway enrichment analysis of significantly dysregulated genes in the LV of obese  
355 ZSF1 rats revealed that the altered genes are significantly enriched in fatty acid and branched-  
356 chain amino acid (BCAA) metabolism pathways (Fig 5B). The increase in ACADM,  
357 EHHADH, HADHA, and HADHB gene expression was shared by both fatty acid and BCAA  
358 metabolism pathways. Altered ACAA2, ACOT2, ACSL6, ECI1, BDH1, HMGCS2, and IDI1  
359 gene expression was fatty acid metabolism specific, and altered expression of DUSP26,  
360 MAOA, MAOB, PHGDH, and PSAT1 in LV was signatory for the BCAA metabolism  
361 pathway (Fig 5C). The unbiased search on MeSH disease terms indicated that altered genes  
362 are highly associated with HF, cardiomyopathy, hypertrophy, cardiac injury, hyperglycemia,  
363 hyperinsulinism, and lipid metabolism errors (Fig 5D). The gene expression profile reflects  
364 the crosstalk of obesity, diabetes, and CVD (Fig 5E). For instance, uncoupling protein 3  
365 (UCP3), carnitine palmitoyltransferase 1A (CPT1A), and patatin like phospholipase domain  
366 containing 2 (PNPLA2), which are at the crossroad of defects in lipid metabolism, glucose  
367 metabolism, and heart injury, were increased in the LV of obese ZSF1 rats. Elevated levels of  
368 PDK4 and thioredoxin interacting protein (TXNIP), and decreased expression of the array of



369 genes associated with both heart diseases and compromised glucose metabolism were observed  
370 (Fig 5E). Interestingly, altered genes and signaling pathways were also shared by different  
371 subtypes of CVD (Fig 5F). For example, decreased MYL2 and MYH6 gene expression  
372 coincided with increased RYR2, HCN4, CORIN, NPPA, ERBB2, and MYH7 gene expression  
373 in hypertrophic and/or dilated cardiomyopathy (Fig 5F).

374 **Fig 5. Gene expression analysis of RNA extracted from left ventricle (LV) of 20-week-old**

375 **obese and lean ZSF1 male rats.** The gene expression analysis of RNA revealed increased  
376 expression of 56 heart abundant genes and decreased expression of 48 heart abundant genes;  
377 the heatmap represents the individual expression changes in obese vs lean ZSF1 rats (A).  
378 Ingenuity pathway analysis (IPA) of enriched metabolic pathways (B) and comparison of  
379 differentially expressed genes (DEGs) presented in the enriched metabolic pathways from IPA  
380 over-represented cardiometabolic Medical Subject Headings (MeSH) terms (C). IPA of 267  
381 significantly increased (FC > 1.5, Benjamini-Hochberg corrected p-value < 0.05) and 431  
382 significantly decreased genes (FC < 2/3, p-value < 0.05) in LV of obese ZSF1 rats (D);  
383 comparison of DEGs enriched in cardiovascular disease (CVD), impaired glucose metabolism,  
384 and lipid metabolism error disease pathways (E); and comparison of DEGs associated with  
385 different subgroups of heart disease pathways from over-representative MeSH term analysis  
386 (F). Gene symbols in bold indicate increase of expression and in italic indicate decrease of  
387 expression.

388 Together, these data provide a compelling case that obese ZSF1 rats exhibit multiple  
389 features of human CMS, including pathological changes in circulating biomarkers and in the  
390 expression of heart abundant genes, cardiovascular dysfunction with preserved ejection  
391 fraction, and decreased exercise capacity.

392 **Obese ZSF1 male rats treated with Fc-GDF15 for 12 weeks**  
393 **demonstrated significant metabolic improvement by changes in**  
394 **systemic parameters and biomarkers of obesity and metabolism**  
395 **impairments**

396 For the duration of Fc-GDF15 or vehicle treatment, both groups of obese ZSF1 rats  
397 were monitored weekly for food intake and body weight and biweekly for blood levels of total  
398 cholesterol, triglycerides, insulin, and glucose (Fig 6). Within the first 2 weeks of Fc-GDF15  
399 treatment, body weight (Fig 6A), food intake (Fig 6B), blood triglycerides (Fig 6C), and blood  
400 glucose levels (Fig 6D) decreased consistently until the end of the study. Blood cholesterol  
401 was 20–30% lower in the Fc-GDF15–treated obese ZSF1 rats (vs vehicle-treated animals) from  
402 week 1 to week 12 of the treatment; however, this decrease did not achieve significance at any  
403 tested time point of the study (Fig 6E). At the same time, insulin levels were significantly  
404 increased at weeks 9 and 12 of Fc-GDF15 treatment (Fig 6F). At the end of the 12-week Fc-  
405 GDF15 treatment, circulating adiponectin concentration was significantly increased (Fig 6G).  
406 Also, endogenous rat GDF15 levels in the serum of Fc-GDF15–treated and vehicle-treated  
407 obese ZSF1 rats remained similar (Fig 6H).

408 **Fig 6. Effect of treatment of ZSF1 obese rats with Fc-GDF15 on systemic metabolic**  
409 **biomarkers.** Treatment of ZSF1 rat with Fc-GDF15 resulted in decreased body weight (A) and  
410 food intake (B), decrease in blood triglyceride (C) and glucose levels (D), and trend in decrease  
411 of blood cholesterol (E). Blood insulin increased over time with GDF15 treatment (F). Twelve  
412 weeks of Fc-GDF15 treatment resulted in increased blood adiponectin (G) and had no effect  
413 on endogenous levels of rat GDF15 (H). Stars (\*) indicate significance (\*  $p < 0.05$ , \*\*  $p <$   
414  $0.01$ , \*\*\*  $p < 0.001$ , \*\*\*\*  $p < 0.0001$ ) by unpaired two-tailed  $t$  test.

415 **Fc-GDF15 treatment of obese ZSF1 rats led to significant changes**  
416 **in systemic levels of CVD-related biomarkers**

417 The systemic levels of cardiovascular biomarkers in obese ZSF1 rats were evaluated at  
418 the end of the study and are presented in S4 Table. Following 12 weeks of Fc-GDF15  
419 administration, we observed significant changes in the array of cardiovascular circulating  
420 biomarkers. Thus, systemic markers of cardiac injury vWF (Fig 7A) and Myl3 (Fig 7B) were  
421 30–50% lower ( $p < 0.05$ ) in the Fc-GDF15 group. HF-associated OPN (Fig 7C), markers of  
422 vascular injury sE-selectin (Fig 7D), sICAM (Fig 7E), VEGF (Fig 7F), and marker of  
423 cardiovascular fibrosis TIMP-1 (Fig 7G) were significantly lower in the serum/plasma of Fc-  
424 GDF15–treated vs vehicle-treated obese ZSF1 rats ( $p < 0.05$ ). At the same time, the other  
425 systemic biomarkers of CVD, such as NT-proBNP, NT-proANP, BNP, FABP3, MCP1, and  
426 aldosterone were not significantly changed by the 12-week–long Fc-GDF15 treatment (S4  
427 Table).

428 **Fig 7. Effect of Fc-GDF15 treatment of ZSF1 obese rats on systemic CVD biomarkers.**

429 Obese ZSF1 rats treated with Fc-GDF15 for 12 weeks exhibit decrease in systemic levels of  
430 cardiovascular disease–related biomarkers vWF (A), Myl3 (B), osteopontin (C), sE-selectin  
431 (D), sICAM (E), VEGF (F), and TIMP-1 (G) at the end of the study. Stars (\*) indicate  
432 significance (\*  $p < 0.05$ , \*\*  $p < 0.01$ , \*\*\*  $p < 0.001$ , \*\*\*\*  $p < 0.0001$ ) by unpaired two-tailed  
433  $t$  test.  $N = 11$  for vehicle-treated group and  $N = 8$  for Fc-GDF15–treated group.

434 **Fc-GDF15 therapeutic approach affected echocardiography**  
435 **parameters of left heart function and improved exercise capacity**  
436 **in obese ZSF1 rats**

437         When we characterized obese ZSF1 rats, we demonstrated that at the age of 20 weeks,  
438 males exhibited impaired cardiac function and decreased exercise capacity. Twelve weeks of  
439 Fc-GDF15 treatment of obese ZSF1 male rats resulted in significantly decreased heart-to-brain  
440 weight ratio (by echocardiography; S5 Table, Fig 8), LV mass, cardiac output, stroke volume,  
441 and ejection fraction when compared with obese ZSF1 rats treated with vehicle (Fig 8A–8E).  
442 Fc-GDF15 treatment had no effect on heart rate (Fig 8F). After 12 weeks of treatment, when  
443 exposed to a treadmill challenge, the Fc-GDF15 group demonstrated improved exercise  
444 capacity (S5 Table) by exhibiting significantly longer running time (Fig 8G) and running  
445 distance (Fig 8H) vs the vehicle group. However, peak  $VO_2$  (a measure of aerobic fitness) and  
446 RER (a fatigue measure) were not significantly different between groups (S5 Table),  
447 suggesting that both groups were run to the same level of exhaustion.

448 **Fig 8. Fc-GDF15–treated obese ZSF1 rats demonstrated improved parameters of cardiac**  
449 **function and increased exercise capacity.** Twelve weeks of Fc-GDF15 treatment decreased  
450 heart weight (A); decreased left ventricular (LV) mass cor (B), cardiac output (C), stroke  
451 volume (D), and ejection fraction (E) but not heart rate (F). Fc-GDF15–treated obese ZSF1  
452 rats demonstrated improved exercise capacity during treadmill exercise by increased length of  
453 time to exhaustion (G) and running distance (H). Stars (\*) indicate significance (\*  $p < 0.05$ , \*\*  
454  $p < 0.01$ , \*\*\*  $p < 0.001$ , \*\*\*\*  $p < 0.0001$ ) by unpaired two-tailed  $t$  test.

## 455 **Discussion**

456 CMS is a combination of primarily IR-associated metabolic disorders with a reciprocal  
457 relationship between impaired metabolism and HFpEF [3]. Our understanding of the  
458 pathophysiology and mechanisms of CMS-related HFpEF is limited due to the minimal  
459 availability of human myocardial biopsies and the lack of animal models that closely mimic  
460 human pathology.

461 Recently, obese ZSF1 rats were proposed as a robust CMS model because at the age of  
462 20 weeks, males demonstrate hypertension, obesity, T2D, impaired metabolism, HF, and  
463 exercise intolerance [4, 7, 22, 30]. The LV hypertrophy, LA dilation, and increased myocardial  
464 stiffness due to myofilament changes (without significant interstitial fibrosis) are well  
465 documented in obese ZSF1 rats [8]. In our study, we have confirmed the previous observations  
466 (Figs 1 and 3). Additionally, we have examined systemic levels of pancreas-related biomarkers  
467 in obese ZSF1 rats and demonstrated pancreatic beta-cell dysfunction with significantly  
468 increased serum C-peptide, proinsulin, glucagon, and amylin (Fig 2A–2D). Since renal  
469 dysfunction is a part of CMS, Hamdani *et al.* [8] compared major parameters of kidney function  
470 in 20-week-old obese vs lean ZSF1 rats and reported hyperglycemia caused glycosuria,  
471 increased urine output, compensatory water intake, and proteinuria, suggesting the presence of  
472 diabetic nephropathy despite preserved creatinine clearance and plasma protein levels.  
473 Significantly increased systemic kidney injury biomarkers KIM-1, NGAL, and clusterin (Fig  
474 2E–2G) confirmed the presence of diabetic nephropathy and kidney damage in 20-week-old  
475 obese ZSF1 male rats.

476 Since biomarkers have emerged as powerful diagnostic and/or prognostic tools for the  
477 variety of CVD in humans, we studied and analyzed in depth the milieu of systemic protein  
478 and local molecular cardiovascular biomarker changes (LV of the heart) triggered by the

479 development of CMS in obese ZSF1 rats and evaluated the translational value of the  
480 observations. Notably, among the array of systemic changes we have documented is an  
481 increase in aldosterone (Fig 4A) together with significant attenuation of NT-proBNP (Fig 4E).  
482 The reciprocal relationship between systemic aldosterone and NT-proBNP was recently  
483 reported in a human CMS populational study ( $n = 1674$ ; age  $\geq 45$  years) [31], where the authors  
484 demonstrated strong ( $p < 0.001$ ) association of aldosterone increase with hypertension, obesity,  
485 chronic kidney disease, metabolic syndrome, high triglycerides, concentric LV hypertrophy,  
486 and atrial fibrillation. They also demonstrated reverse correlation between aldosterone and  
487 NT-proBNP. During the last decade, several scientific reports from human populational  
488 studies have demonstrated that serum NT-proBNP concentrations were relatively lower in  
489 overweight and obese patients [32-34], suggesting that natriuretic peptides may provide a link  
490 between the heart and adipose tissue [35]. The observation that human subcutaneous adipose  
491 tissue from obese subjects with T2D exhibits markedly increased natriuretic peptide (NP)  
492 receptor expression and higher clearance of NT-proBNP from the circulation [36] may explain  
493 why we observed a significant decrease in serum NT-proBNP without NPPB mRNA  
494 expression changes in the left heart of obese ZSF1 rats (Fig 4).

495 FABP3 is abundantly expressed in cardiomyocyte cytoplasm; its circulating level is  
496 positively correlated with LV mass index ( $p < 0.0001$ ,  $r = 0.7226$ ). Therefore, FABP3 was  
497 proposed as an early biomarker of myocardial injury in humans [37]. ST2, a circulating  
498 protein marker of cardiomyocyte stress and fibrosis, which increases in patients across a wide  
499 spectrum of CVDs, is now recommended by the American College of Cardiology Foundation  
500 and American Heart Association joint guidelines for additive risk stratification in patients with  
501 HF [38]. Chronic inflammation contributes to cardiac fibrosis, and systemic IL-16 levels are  
502 specifically elevated in HFpEF patients (compared with HF with reduced ejection fraction  
503 [HFrEF] and controls), with a significant association between serum IL-16 and indices of LV

504 diastolic dysfunction (LAVI, E/E', and DWS) [39]. In concert with the published results from  
505 human studies, serum FABP3, ST2, and IL-16 protein concentrations were significantly  
506 elevated in 20-week-old obese ZSF1 male rats (Fig 4B–4D).

507 OPN (abundant kidney protein majorly synthesized in the loop of Henle) is among the  
508 biomarkers of HF progression; it is known to be expressed at medium levels in heart tissue by  
509 endothelial cells, cardiomyocytes, and fibroblasts. Several groups reported human plasma  
510 OPN elevation in patients with advanced HF [40] and specifically in HFpEF cohorts [41].  
511 Lopez *et al.* [42] have reported no association of plasma OPN with HF, whereas the myocardial  
512 expression of OPN was highly elevated in HF patients ( $p < 0.0001$ ). Our preclinical results  
513 confirm the latter report and provide, for the first time, evidence that myocardial OPN is up-  
514 regulated in the heart of rats with HFpEF, as shown in murine models of HF [43].

515 Based on transcriptome analysis, approximately 60% ( $n = 12,224$  of 19,613) of protein-  
516 coding genes are expressed in heart tissue [44]. Two hundred of these genes show an elevated  
517 expression in heart compared to other tissue types, and most of the corresponding proteins  
518 (localized in the cytoplasm and in the sarcomeres) are involved in muscle contraction, ion  
519 transport, and ATPase activity. Understanding the pathophysiology of cardiac alterations in  
520 CMS is critical. Our comparative RNA-seq analysis (lean vs obese ZSF1) of rat LV heart  
521 abundant genes revealed 267 significantly increased genes and 431 significantly decreased  
522 genes, of which 56 increased genes and 48 decreased genes are among the abundant genes in  
523 human heart (Fig 5A). Enriched signaling and disease pathway analyses added to our current  
524 understanding of how intermediary metabolism affects LV hypertrophy and influences heart  
525 tissue remodeling and repair. In the ZSF1 rat CMS model, obesity and impaired metabolism  
526 have also greatly increased CVD pathology by altering two major metabolic pathways in heart  
527 tissue (Fig 5B and 5C)—fatty acid metabolism and BCAA metabolism. In general, cardiac  
528 metabolic homeostasis of fatty acid, glucose, ketone bodies, and BCAAs is well established

529 through intertwined regulatory networks [45, 46]. Thus, gene expression of essential enzymes  
530 involved in both fatty acid metabolism and BCAA catabolism—ACADM, EHHADH,  
531 HADHA, and HADHB—is greatly increased in obese ZSF1 LV heart tissue. It has been  
532 reported that acyl-CoA deficiency in human failing heart disrupts cardiac energy production  
533 and leads to cardiac lipotoxicity, which has a negative impact on the heart as it impairs its  
534 ability to function and pump properly [47]. ACAA2, ACADM, ACSL6, ACOT2, EHHADH,  
535 HADHA, and HADHB are enzymes functionally involved in acyl-CoA metabolism. Human  
536 genome-wide association studies (GWAS) have indicated that mutations in HADHA and  
537 HADHB are associated with familial hypertrophic cardiomyopathy [48], and mutations in  
538 CPT1, ACADM, and ACAA2 genes are associated with impaired mitochondrial fatty acid  $\beta$ -  
539 oxidation [49]. Several enzymes (ACADM, ACSL6, EHHADH, and HMGCS2) are regulated  
540 by proliferator-activated receptors (PPARs), which manipulate the fuel supply and substrate  
541 and modulate HF progression [50, 51]. Based on the MeSH database analysis, we have  
542 demonstrated that in the obese ZSF1 rat model, the top representative diseases were CVD,  
543 hyperinsulinemia, hyperglycemia, and lipid metabolism defects (Fig 5D). Obesity and T2D  
544 are among the top drivers of HFpEF progression [2, 3]. Transcriptome profiling revealed the  
545 array of genes and pathways potentially mediating the cardiac metabolic shift, glucose and lipid  
546 toxicity, and the development of cardiomyopathy (Fig 5E). For instance, UCP3, CPT1A, and  
547 PNPLA2 are shared DEGs among impaired lipid metabolism, glucose metabolism, and CVD.  
548 CPT1A and UCP3 are involved in cardiac glucose oxidation, mitochondrial fatty acid  
549 oxidation, and ATP production. CPT1 inhibition has demonstrated beneficial effect in HF [52],  
550 and UCP3 was considered a marker for cellular metabolic state [53]. Mutations in PNPLA2  
551 (which encodes adipose triglyceride lipase, ATGL) have been associated with triglyceride  
552 deposit cardiomyovasculopathy (TCGV) [54]. Mori *et al.* [55] have found that deletion of  
553 pyruvate dehydrogenase kinase 4 (PDK4) prevented angiotensin II-induced cardiac



554 hypertrophy and improved cardiac glucose oxidation and energy usage. MeSH-based disease  
555 analysis demonstrated that significant changes in cardiomyocyte genes (decreased MYL2 and  
556 MYH6 and increased RYR2, HCN4, CORIN, NPPA, ERBB2, and MYH7) in LV of obese  
557 ZSF1 rats were strongly associated with dilated cardiomyopathy, LV hypertrophy, and HF (Fig  
558 5F), and were similar to those observed in human genetic studies [56]. The array of expression  
559 changes in LV heart abundant genes in obese ZSF1 rats would help us to better understand the  
560 cardiac metabolic shift and cardiomyopathy in CMS; to allocate the major players mediating  
561 the crosstalk between glucose, lipid metabolism, and development of CVD; and to potentially  
562 identify key markers of cardiac energy status and heart injury grade. Hence, transcriptome  
563 profiling of lean and obese ZSF1 rats further supports the translational value of the obese ZSF1  
564 CMS rat model in biomarker discovery and evaluation of therapeutic targets.

565 GDF15 is a distant member of the TGF- $\beta$  superfamily. It is secreted, circulating in  
566 plasma as a 25 kDa homodimer [9, 10], and has become a novel exploratory biomarker of CMS  
567 because its circulating levels are increased in humans with metabolic syndrome [11, 14, 19]  
568 and in subjects with increased risk of CVD [12, 13]. In concert with human data, GDF15 levels  
569 do rise following a sustained high-fat diet or dietary amino acid imbalance in mice [57], and  
570 according to our present report (Fig 1G), GDF15 is significantly increased in the serum of  
571 obese ZSF1 rats. To date, GDF15 is positioned as a stress-induced hormone that mediates an  
572 aversive dietary response in preclinical species; when it was tested in obese mouse and non-  
573 human primate models, treatment resulted in significantly reduced body weight and food  
574 intake, increased energy expenditure, and improved glucose tolerance [14, 15].

575 Results reported here make a compelling case for obese ZSF1 rats exhibiting multiple  
576 features of human CMS, which include pathological changes in systemic renal, metabolic, and  
577 CVD circulating biomarkers, HFpEF, and decreased exercise capacity. Recently published  
578 studies in obese preclinical models [14, 15, 57] demonstrated aversive dietary response to

579 GDF15 treatment, leading to improvement in metabolic parameters. We treated obese ZSF1  
580 rats with Fc-GDF15 for 12 weeks and compared the outcome with that in vehicle-treated obese  
581 ZSF1 rats. Twelve-week Fc-GDF15 treatment resulted in a significant decrease in body weight  
582 and food intake, demonstrating its capacity to mediate aversive dietary response. Fc-GDF15  
583 improved metabolic parameters (decreased blood glucose and triglycerides) in obese ZSF1 rats  
584 (Fig 6A–6F), similar to previously reported results in diet-induced obese mice and obese  
585 cynomolgus monkeys [15], and significantly increased serum adiponectin in Fc-GDF15–  
586 treated obese ZSF1 rats. Adiponectin is mainly secreted by adipocytes, but also by skeletal  
587 muscle cells, cardiac myocytes, and endothelial cells. Reduction of adiponectin plays a central  
588 role in CMS because it is positively associated with insulin sensitivity [58] and shows  
589 anti-atherogenic and anti-inflammatory properties; according to numerous epidemiological  
590 studies, hypoadiponectinemia (adiponectin deficiency) is additionally associated with CVDs  
591 such as hypertension, coronary artery disease, and LV hypertrophy [59]. While circulating  
592 adiponectin was decreased by 30% in obese vs lean ZSF1 rats (Fig 1F), Fc-GDF15 treatment  
593 led to its significant systemic increase (29%; Fig 6G) vs obese ZSF1 rats treated with vehicle.  
594 Although Fc-GDF15 treatment did not lead to systemic changes in aldosterone, NT-proBNP,  
595 and FABP3 (S4 Table) in obese ZSF1 rats, the novel and exploratory systemic protein markers  
596 [60] of cardiac injury vWF and Myl3; HF-associated OPN; markers of vascular injury sE-  
597 selectin, sICAM, and VEGF; and cardiovascular fibrosis marker TIMP-1 were significantly  
598 lower in Fc-GDF15–treated obese rats vs vehicle-treated obese rats (Fig 7). In addition to the  
599 positive changes in the array of systemic cardiometabolic biomarkers, 12-week–long Fc-  
600 GDF15 therapy led to a considerable decrease in heart weight, improved parameters of LV  
601 function (decreased LV mass, cardiac output, and stroke volume; Fig 8), and increased exercise  
602 capacity (time to exhaustion and distance; Fig 8) when compared with vehicle-treated obese  
603 ZSF1 rats.

## 604 **Conclusion**

605 In summary, the obese ZSF1 male rat represents a preclinical model with established  
606 HFpEF that can mimic human CMS. Furthermore, Fc-GDF15 treatment of obese ZSF1 rats  
607 demonstrated its cardioprotective therapeutic effect in this model. These findings may have  
608 important clinical implications for potential pharmacologic treatment of obesity and associated  
609 comorbidities such as HF, where the unmet medical need remains high.

## 610 **Acknowledgements**

611 The authors thank Cathryn M. Carter of Amgen Inc for editorial support; she received  
612 compensation as an employee of Amgen Inc.

## 613 **Financial Disclosure Statement**

614 This study was funded by Amgen Inc. Beyond the named authors, who are employees of  
615 Amgen, the sponsor reviewed the manuscript but had no role in study design, data collection  
616 and analysis, decision to publish, or preparation of the manuscript.

## 617 **Author Contributions**

618 Marina Stolina designed the studies, analyzed the results and wrote the manuscript; Xin Luo  
619 provided transcriptome analysis of RNAseq results, differential expression pathway analysis  
620 and contributed to the Results and Discussion of current manuscript; Denise Dwyer produced,  
621 and analyzed biochemical biomarkers-related data; Chun-Ya Han characterized ZSF1 strain  
622 based on the local and systemic biomarker profiles; Rhonda Chen and Ying Zhang provided  
623 echocardiography data collection and initial analysis; YuMei Xiong designed and provided  
624 initial analysis of Fc-GDF15 study; Yinhong Chen provided echocardiography and PV loop  
625 data collection and comprehensive analysis; Jun Yin provided transcriptome analysis and initial

626 interpretation of RNAseq results; Brandon Ason provided invasive hemodynamic assessment,  
627 treadmill assessment and interpretation of the studies; Clarence Hale contributed to the studies  
628 design, data analysis and interpretation and the writing of the manuscript; Murielle M. Véniant  
629 provided major input to the studies design, analysis and interpretation of the results and the  
630 writing/editing of the manuscript.

631 All authors read and approved the final manuscript.

## 632 **References**

- 633 1. Kelli HM, Kassas I, Lattouf OM. Cardio metabolic syndrome: a global epidemic. *J Diabetes*  
634 *Metab.* 2015;6(3).
- 635 2. Caleyachetty R, Thomas GN, Toulis KA, Mohammed N, Gokhale KM, Balachandran K, et  
636 al. Metabolically healthy obese and incident cardiovascular disease events among 3.5 million  
637 men and women. *J Am Coll Cardiol.* 2017;70(12):1429-1437.
- 638 3. von Bibra H, Paulus W, St John Sutton M. Cardiometabolic syndrome and increased risk of  
639 heart failure. *Curr Heart Fail Rep.* 2016;13(5):219-229.
- 640 4. Tofovic SP, Kusaka H, Kost CK, Jr., Bastacky S. Renal function and structure in diabetic,  
641 hypertensive, obese ZDFxSHHF-hybrid rats. *Ren Fail.* 2000;22(4):387-406.
- 642 5. Griffin KA, Abu-Naser M, Abu-Amarah I, Picken M, Williamson GA, Bidani AK. Dynamic  
643 blood pressure load and nephropathy in the ZSF1 (fa/fa cp) model of type 2 diabetes. *Am J*  
644 *Physiol Renal Physiol.* 2007;293(5):F1605-1613.
- 645 6. Joshi D, Gupta R, Dubey A, Shiwalkar A, Pathak P, Gupta RC, et al. TRC4186, a novel  
646 AGE-breaker, improves diabetic cardiomyopathy and nephropathy in Ob-ZSF1 model of type  
647 2 diabetes. *J Cardiovasc Pharmacol.* 2009;54(1):72-81.
- 648 7. Conceicao G, Heinonen I, Lourenco AP, Duncker DJ, Falcao-Pires I. Animal models of heart  
649 failure with preserved ejection fraction. *Neth Heart J.* 2016;24(4):275-286.
- 650 8. Hamdani N, Franssen C, Lourenco A, Falcao-Pires I, Fontoura D, Leite S, et al. Myocardial  
651 titin hypophosphorylation importantly contributes to heart failure with preserved ejection  
652 fraction in a rat metabolic risk model. *Circ Heart Fail.* 2013;6(6):1239-1249.
- 653 9. Tsai VW, Manandhar R, Jorgensen SB, Lee-Ng KK, Zhang HP, Marquis CP, et al. The  
654 anorectic actions of the TGFbeta cytokine MIC-1/GDF15 require an intact brainstem area  
655 postrema and nucleus of the solitary tract. *PLoS One.* 2014;9(6):e100370.

- 656 10. Bottner M, Laaff M, Schechinger B, Rappold G, Unsicker K, Suter-Crazzolara C.  
657 Characterization of the rat, mouse, and human genes of growth/differentiation factor-  
658 15/macrophage inhibiting cytokine-1 (GDF-15/MIC-1). *Gene*. 1999;237(1):105-111.
- 659 11. Ding Q, Mracek T, Gonzalez-Muniesa P, Kos K, Wilding J, Trayhurn P, et al. Identification  
660 of macrophage inhibitory cytokine-1 in adipose tissue and its secretion as an adipokine by  
661 human adipocytes. *Endocrinology*. 2009;150(4):1688-1696.
- 662 12. Brown DA, Breit SN, Buring J, Fairlie WD, Bauskin AR, Liu T, et al. Concentration in  
663 plasma of macrophage inhibitory cytokine-1 and risk of cardiovascular events in women: a  
664 nested case-control study. *Lancet*. 2002;359(9324):2159-2163.
- 665 13. Kempf T, Bjorklund E, Olofsson S, Lindahl B, Allhoff T, Peter T, et al. Growth-  
666 differentiation factor-15 improves risk stratification in ST-segment elevation myocardial  
667 infarction. *Eur Heart J*. 2007;28(23):2858-2865.
- 668 14. Tsai VW, Husaini Y, Sainsbury A, Brown DA, Breit SN. The MIC-1/GDF15-GFRAL  
669 pathway in energy homeostasis: implications for obesity, cachexia, and other associated  
670 diseases. *Cell Metab*. 2018;28(3):353-368.
- 671 15. Xiong Y, Walker K, Min X, Hale C, Tran T, Komorowski R, et al. Long-acting MIC-  
672 1/GDF15 molecules to treat obesity: evidence from mice to monkeys. *Sci Transl Med*.  
673 2017;9(412).
- 674 16. Emmerson PJ, Wang F, Du Y, Liu Q, Pickard RT, Gonciarz MD, et al. The metabolic  
675 effects of GDF15 are mediated by the orphan receptor GFRAL. *Nat Med*. 2017;23(10):1215-  
676 1219.
- 677 17. Hsu JY, Crawley S, Chen M, Ayupova DA, Lindhout DA, Higbee J, et al. Non-homeostatic  
678 body weight regulation through a brainstem-restricted receptor for GDF15. *Nature*.  
679 2017;550(7675):255-259.

- 680 18. Mullican SE, Lin-Schmidt X, Chin C-N, Chavez JA, Furman JL, Armstrong AA, et al.  
681 GFRAL is the receptor for GDF15 and the ligand promotes weight loss in mice and nonhuman  
682 primates. *Nat Med.* 2017;23:1150.
- 683 19. Mullican SE, Rangwala SM. Uniting GDF15 and GFRAL: therapeutic opportunities in  
684 obesity and beyond. *Trends Endocrinol Metab.* 2018;29(8):560-570.
- 685 20. Chrysovergis K, Wang X, Kosak J, Lee SH, Kim JS, Foley JF, et al. NAG-1/GDF-15  
686 prevents obesity by increasing thermogenesis, lipolysis and oxidative metabolism. *Int J Obes*  
687 *(Lond).* 2014;38(12):1555-1564.
- 688 21. Chung HK, Ryu D, Kim KS, Chang JY, Kim YK, Yi HS, et al. Growth differentiation  
689 factor 15 is a myomitokine governing systemic energy homeostasis. *J Cell Biol.*  
690 2017;216(1):149-165.
- 691 22. Lourenço André P, Falcão-Pires I, Cerqueira R, Fontoura D, Miranda D, Hamdani N, et  
692 al. Abstract 17471: The Obese Zsfl Rat as a New Model of Heart Failure with Preserved  
693 Ejection Fraction Accompanying the Metabolic Syndrome. *Circulation.*  
694 2012;126(suppl\_21):A17471-A17471.
- 695 23. OmicSoft. Available from: [www.omicsoft.com/array-studio.php](http://www.omicsoft.com/array-studio.php). Accessed 20 January  
696 2020.
- 697 24. Li B, Dewey CN. RSEM: accurate transcript quantification from RNA-Seq data with or  
698 without a reference genome. *BMC Bioinformatics.* 2011;12:323.
- 699 25. Love MI, Huber W, Anders S. Moderated estimation of fold change and dispersion for  
700 RNA-seq data with DESeq2. *Genome Biol.* 2014;15(12):550.
- 701 26. GTEx Consortium. The Genotype-Tissue Expression (GTEx) project. *Nat Genet.*  
702 2013;45(6):580-585.
- 703 27. Gu Z, Eils R, Schlesner M. Complex heatmaps reveal patterns and correlations in  
704 multidimensional genomic data. *Bioinformatics.* 2016;32(18):2847-2849.

- 705 28. Yu G. Using meshes for MeSH term enrichment and semantic analyses. *Bioinformatics*.  
706 2018;34(21):3766-3767.
- 707 29. Yu G, Wang LG, Han Y, He QY. clusterProfiler: an R package for comparing biological  
708 themes among gene clusters. *OMICS*. 2012;16(5):284-287.
- 709 30. Riehle C, Bauersachs J. Small animal models of heart failure. *Cardiovasc Res*.  
710 2019;115(13):1838-1849.
- 711 31. Buglioni A, Cannone V, Cataliotti A, Sangaralingham SJ, Heublein DM, Scott CG, et al.  
712 Circulating aldosterone and natriuretic peptides in the general community: relationship to  
713 cardiorenal and metabolic disease. *Hypertension*. 2015;65(1):45-53.
- 714 32. Bayes-Genis A, Lloyd-Jones DM, van Kimmenade RR, Lainchbury JG, Richards AM,  
715 Ordonez-Llanos J, et al. Effect of body mass index on diagnostic and prognostic usefulness of  
716 amino-terminal pro-brain natriuretic peptide in patients with acute dyspnea. *Arch Intern Med*.  
717 2007;167(4):400-407.
- 718 33. Neeland IJ, Winders BR, Ayers CR, Das SR, Chang AY, Berry JD, et al. Higher natriuretic  
719 peptide levels associate with a favorable adipose tissue distribution profile. *J Am Coll Cardiol*.  
720 2013;62(8):752-760.
- 721 34. Fedele D, Bicchiega V, Collo A, Barutta F, Pistone E, Gruden G, et al. Short term variation  
722 in NTproBNP after lifestyle intervention in severe obesity. *PloS One*. 2017;12(7):e0181212.
- 723 35. Pivovarova O, Gogebakan O, Kloting N, Sparwasser A, Weickert MO, Haddad I, et al.  
724 Insulin up-regulates natriuretic peptide clearance receptor expression in the subcutaneous fat  
725 depot in obese subjects: a missing link between CVD risk and obesity? *J Clin Endocrinol Metab*.  
726 2012;97(5):E731-739.
- 727 36. Kovacova Z, Tharp WG, Liu D, Wei W, Xie H, Collins S, et al. Adipose tissue natriuretic  
728 peptide receptor expression is related to insulin sensitivity in obesity and diabetes. *Obesity*  
729 (Silver Spring). 2016;24(4):820-828.



- 730 37. Varrone F, Gargano B, Carullo P, Di Silvestre D, De Palma A, Grasso L, et al. The  
731 circulating level of FABP3 is an indirect biomarker of microRNA-1. *J Am Coll Cardiol.*  
732 2013;61(1):88-95.
- 733 38. Daniels LBB-G, Antoni. Using ST2 in cardiovascular patients: a review. *Future Cardiol.*  
734 2014;10(4):525-539
- 735 39. Tamaki S, Mano T, Sakata Y, Ohtani T, Takeda Y, Kamimura D, et al. Interleukin-16  
736 promotes cardiac fibrosis and myocardial stiffening in heart failure with preserved ejection  
737 fraction. *PLoS One.* 2013;8(7):e68893.
- 738 40. Rosenberg M, Zugck C, Nelles M, Juenger C, Frank D, Remppis A, et al. Osteopontin, a  
739 new prognostic biomarker in patients with chronic heart failure. *Circ Heart Fail.* 2008;1(1):43-  
740 49.
- 741 41. Coculescu BI, Manole G, Dinca GV, Coculescu EC, Berceanu C, Stocheci CM. Osteopontin  
742 - a biomarker of disease, but also of stage stratification of the functional myocardial contractile  
743 deficit by chronic ischaemic heart disease. *J Enzyme Inhib Med Chem.* 2019;34(1):783-788.
- 744 42. Lopez B, Gonzalez A, Lindner D, Westermann D, Ravassa S, Beaumont J, et al.  
745 Osteopontin-mediated myocardial fibrosis in heart failure: a role for lysyl oxidase? *Cardiovasc*  
746 *Res.* 2013;99(1):111-120.
- 747 43. Xie Z, Singh M, Singh K. Osteopontin modulates myocardial hypertrophy in response to  
748 chronic pressure overload in mice. *Hypertension.* 2004;44(6):826-831.
- 749 44. The Human Protein Atlas. <https://www.proteinatlas.org/humanproteome/tissue/heart>.  
750 Accessed 20 January 2020.
- 751 45. Gibb AA, Hill BG. Metabolic coordination of physiological and pathological cardiac  
752 remodeling. *Circ Res.* 2018;123(1):107-128.

- 753 46. Tobias DK, Lawler PR, Harada PH, Demler OV, Ridker PM, Manson JE, et al. Circulating  
754 branched-chain amino acids and incident cardiovascular disease in a prospective cohort of US  
755 women. *Circ Genom Precis Med*. 2018;11(4):e002157.
- 756 47. Goldenberg JR, Carley AN, Ji R, Zhang X, Fasano M, Schulze PC, et al. Preservation of  
757 acyl coenzyme A attenuates pathological and metabolic cardiac remodeling through selective  
758 lipid trafficking. *Circulation*. 2019;139(24):2765-2777.
- 759 48. Choi J-H, Yoon H-R, Kim G-H, Park S-J, Shin Y-L, Yoo H-W. Identification of novel  
760 mutations of the HADHA and HADHB genes in patients with mitochondrial trifunctional  
761 protein deficiency. *Int J Mol Med*. 2007;19:81-87.
- 762 49. Das AM, Steuerwald U, Illsinger S. Inborn errors of energy metabolism associated with  
763 myopathies. *J Biomed Biotechnol*. 2010;2010:340849.
- 764 50. Ichikawa T, Kita M, Matsui TS, Nagasato AI, Araki T, Chiang SH, et al. Vinexin family  
765 (SORBS) proteins play different roles in stiffness-sensing and contractile force generation. *J*  
766 *Cell Sci*. 2017;130(20):3517-3531.
- 767 51. Liao HH, Jia XH, Liu HJ, Yang Z, Tang QZ. The role of PPARs in pathological cardiac  
768 hypertrophy and heart failure. *Curr Pharm Des*. 2017;23(11):1677-1686.
- 769 52. Fillmore N, Lopaschuk GD. Targeting mitochondrial oxidative metabolism as an approach  
770 to treat heart failure. *Biochim Biophys Acta*. 2013;1833(4):857-865.
- 771 53. Hilse KE, Rupprecht A, Egerbacher M, Bardakji S, Zimmermann L, Wulczyn A, et al. The  
772 expression of uncoupling protein 3 coincides with the fatty acid oxidation type of metabolism  
773 in adult murine heart. *Front Physiol*. 2018;9:747.
- 774 54. Li M, Hirano KI, Ikeda Y, Higashi M, Hashimoto C, Zhang B, et al. Triglyceride deposit  
775 cardiomyovasculopathy: a rare cardiovascular disorder. *Orphanet J Rare Dis*. 2019;14(1):134.

- 776 55. Mori J, Alrob OA, Wagg CS, Harris RA, Lopaschuk GD, Oudit GY. ANG II causes insulin  
777 resistance and induces cardiac metabolic switch and inefficiency: a critical role of PDK4. *Am*  
778 *J Physiol Heart Circ Physiol*. 2013;304(8):H1103-1113.
- 779 56. Tobita T, Nomura S, Fujita T, Morita H, Asano Y, Onoue K, et al. Genetic basis of  
780 cardiomyopathy and the genotypes involved in prognosis and left ventricular reverse  
781 remodeling. *Sci Rep*. 2018;8(1):1998.
- 782 57. Patel S, Alvarez-Guaita A, Melvin A, Rimmington D, Dattilo A, Miedzybrodzka EL, et al.  
783 GDF15 provides an endocrine signal of nutritional stress in mice and humans. *Cell Metab*.  
784 2019;29(3):707-718. e708.
- 785 58. Yamauchi T, Kamon J, Waki H, Terauchi Y, Kubota N, Hara K, et al. The fat-derived  
786 hormone adiponectin reverses insulin resistance associated with both lipodystrophy and obesity.  
787 *Nat Med*. 2001;7:941-946.
- 788 59. Achari AE, Jain SK. Adiponectin, a therapeutic target for obesity, diabetes, and endothelial  
789 dysfunction. *Int J Mol Sci*. 2017;18(6).
- 790 60. Upadhyay RK. Emerging risk biomarkers in cardiovascular diseases and disorders. *J Lipids*.  
791 2015;2015:971453.
- 792

## 793 **Supporting information**

794 **S1 Text. Gene models used for alignment and quantification.**

795 **S1 Table. Metabolic and renal biomarkers in serum/plasma of 20-week-old lean and**  
796 **obese ZSF1 male rats.**

797 **S2 Table. Cardiovascular biomarkers in circulation of 20-week-old lean and obese ZSF1**  
798 **male rats.**

799 **S3 Table. Invasive hemodynamic assessment, echocardiography, and exercise capacity of**  
800 **20- to 21-week-old lean and obese ZSF1 male rats.**

801 **S4 Table. Effect of 12-week-long Fc-hGDF15 treatment on systemic levels of**  
802 **cardiovascular markers.**

803 **S5 Table. Effect of 12-week-long Fc-hGDF15 treatment on parameters of invasive**  
804 **hemodynamic assessment, echocardiography, and exercise capacity of obese ZSF1 male**  
805 **rats.**

806 **S6 Table. Heart abundant tissue gene expression increase in LV of obese vs lean ZSF1**  
807 **groups.**

808 **S7 Table. Heart abundant tissue gene expression decrease in LV of obese vs lean ZSF1**  
809 **groups.**

810

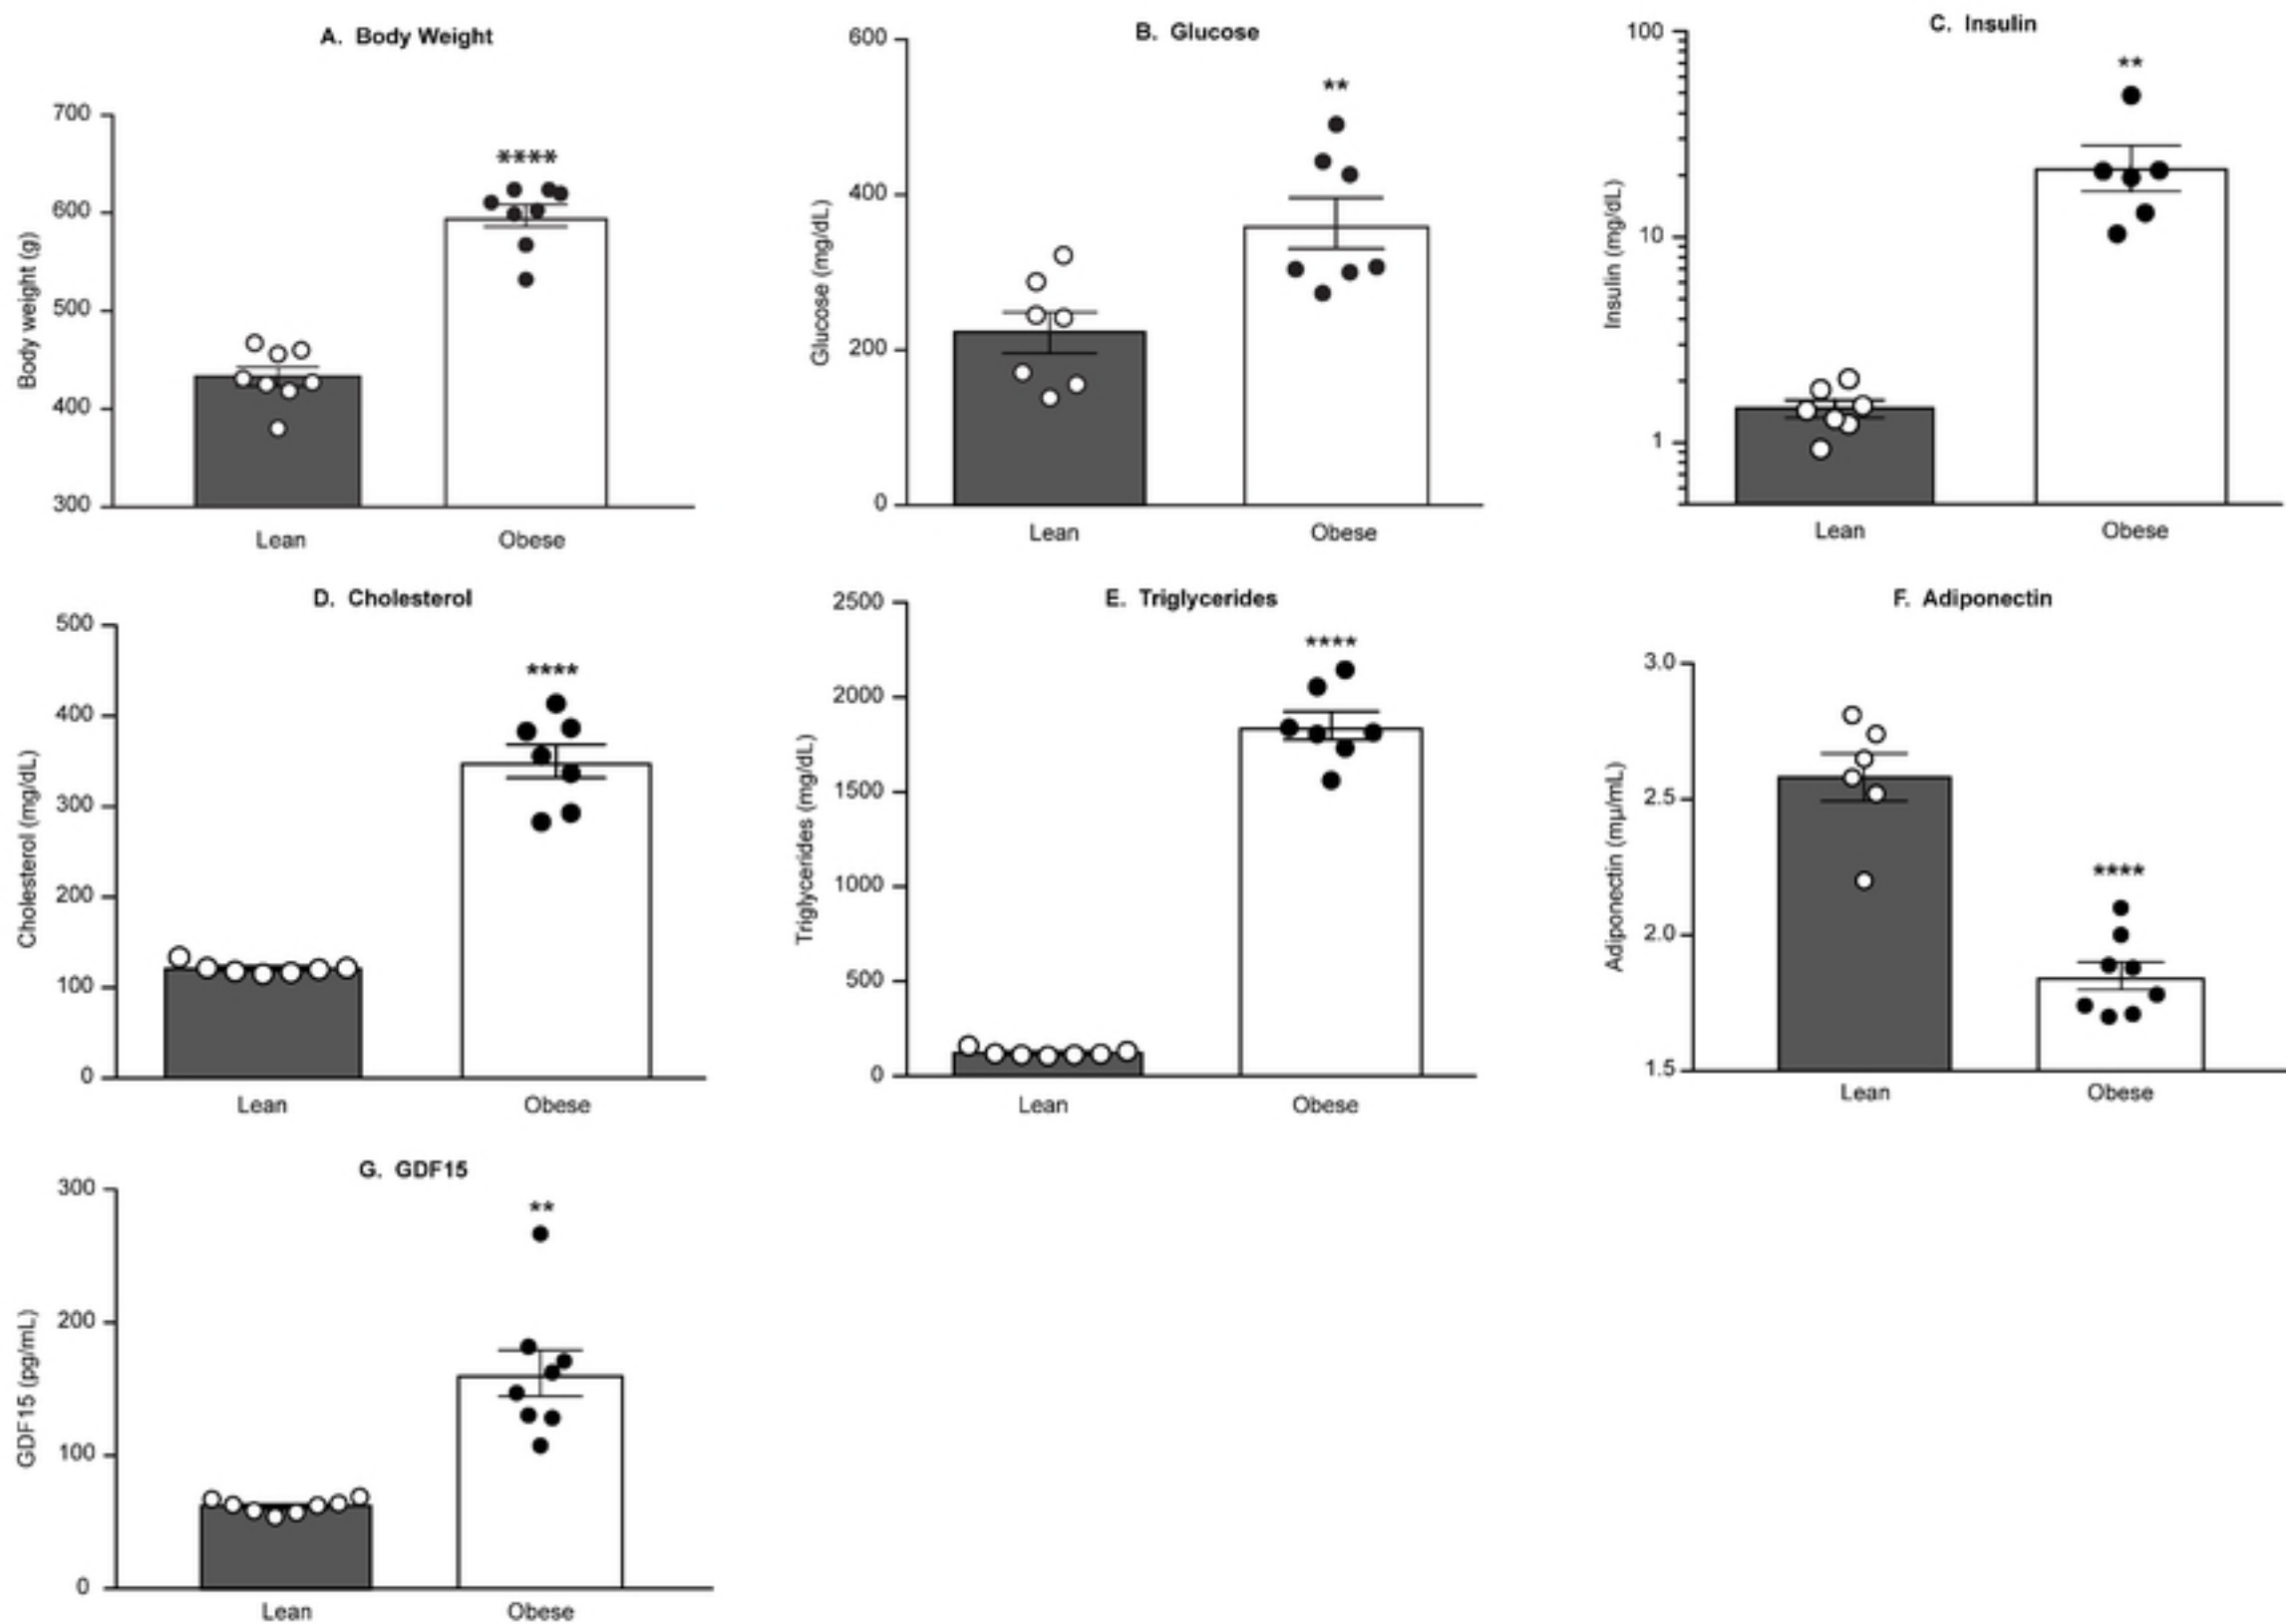

Figure 1

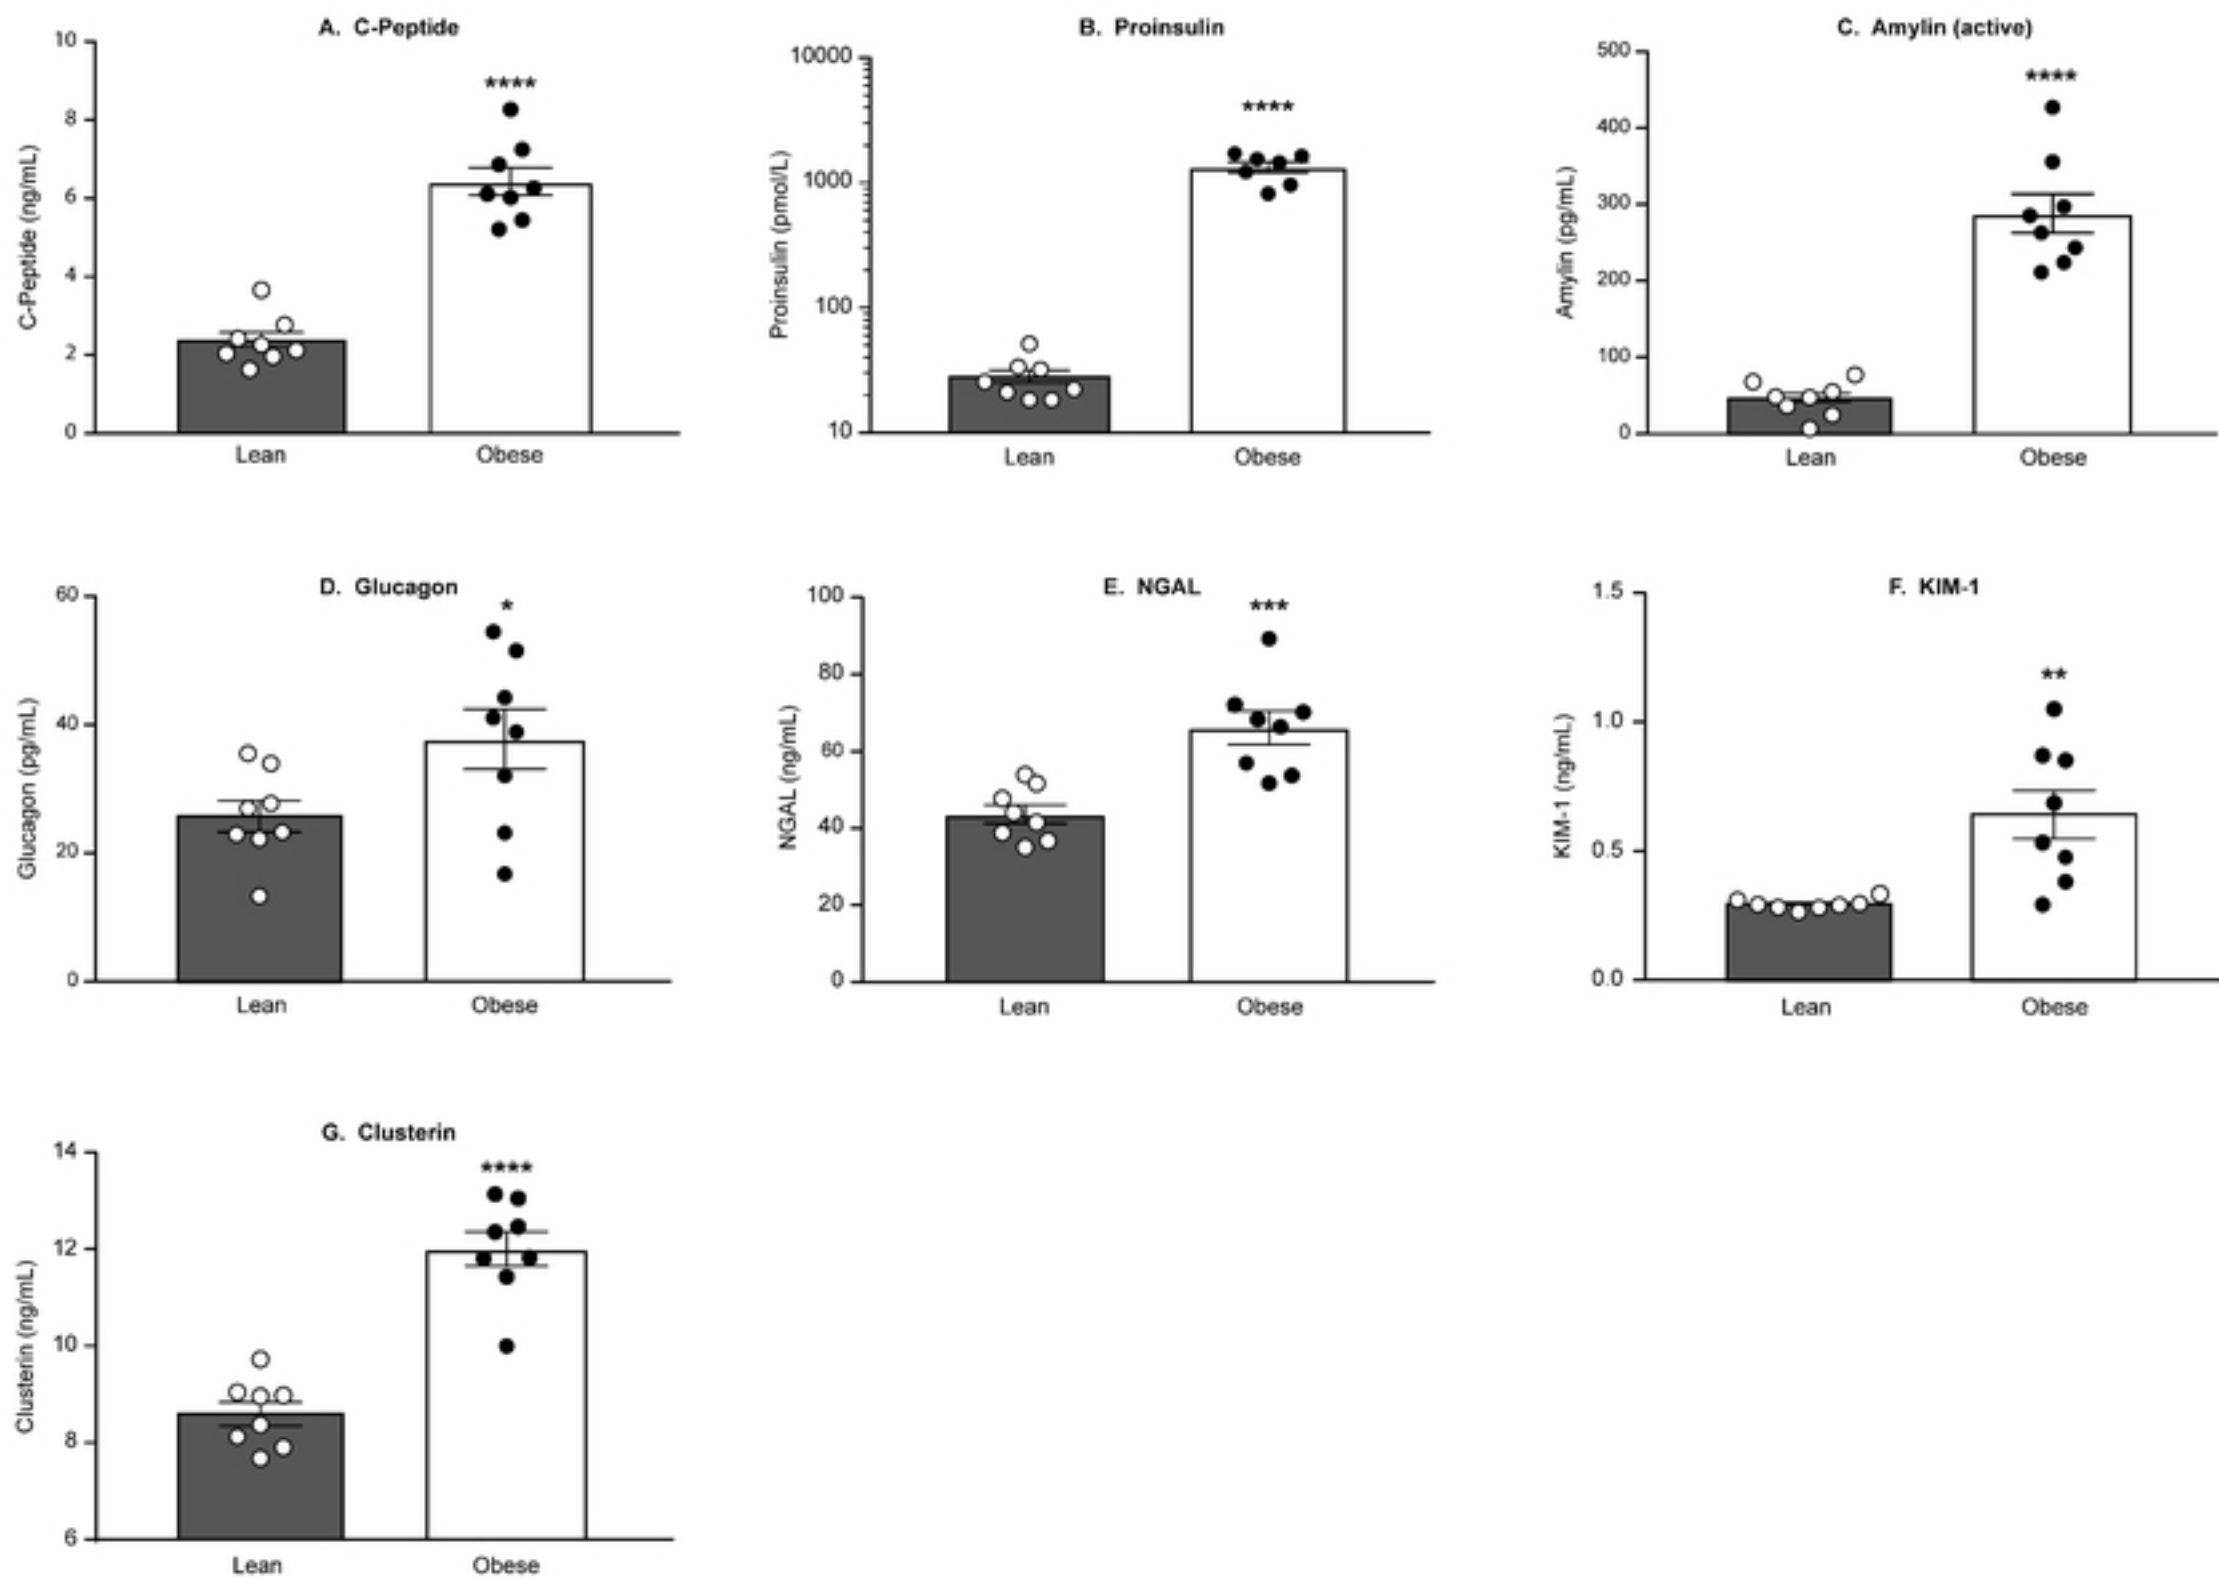

Figure 2

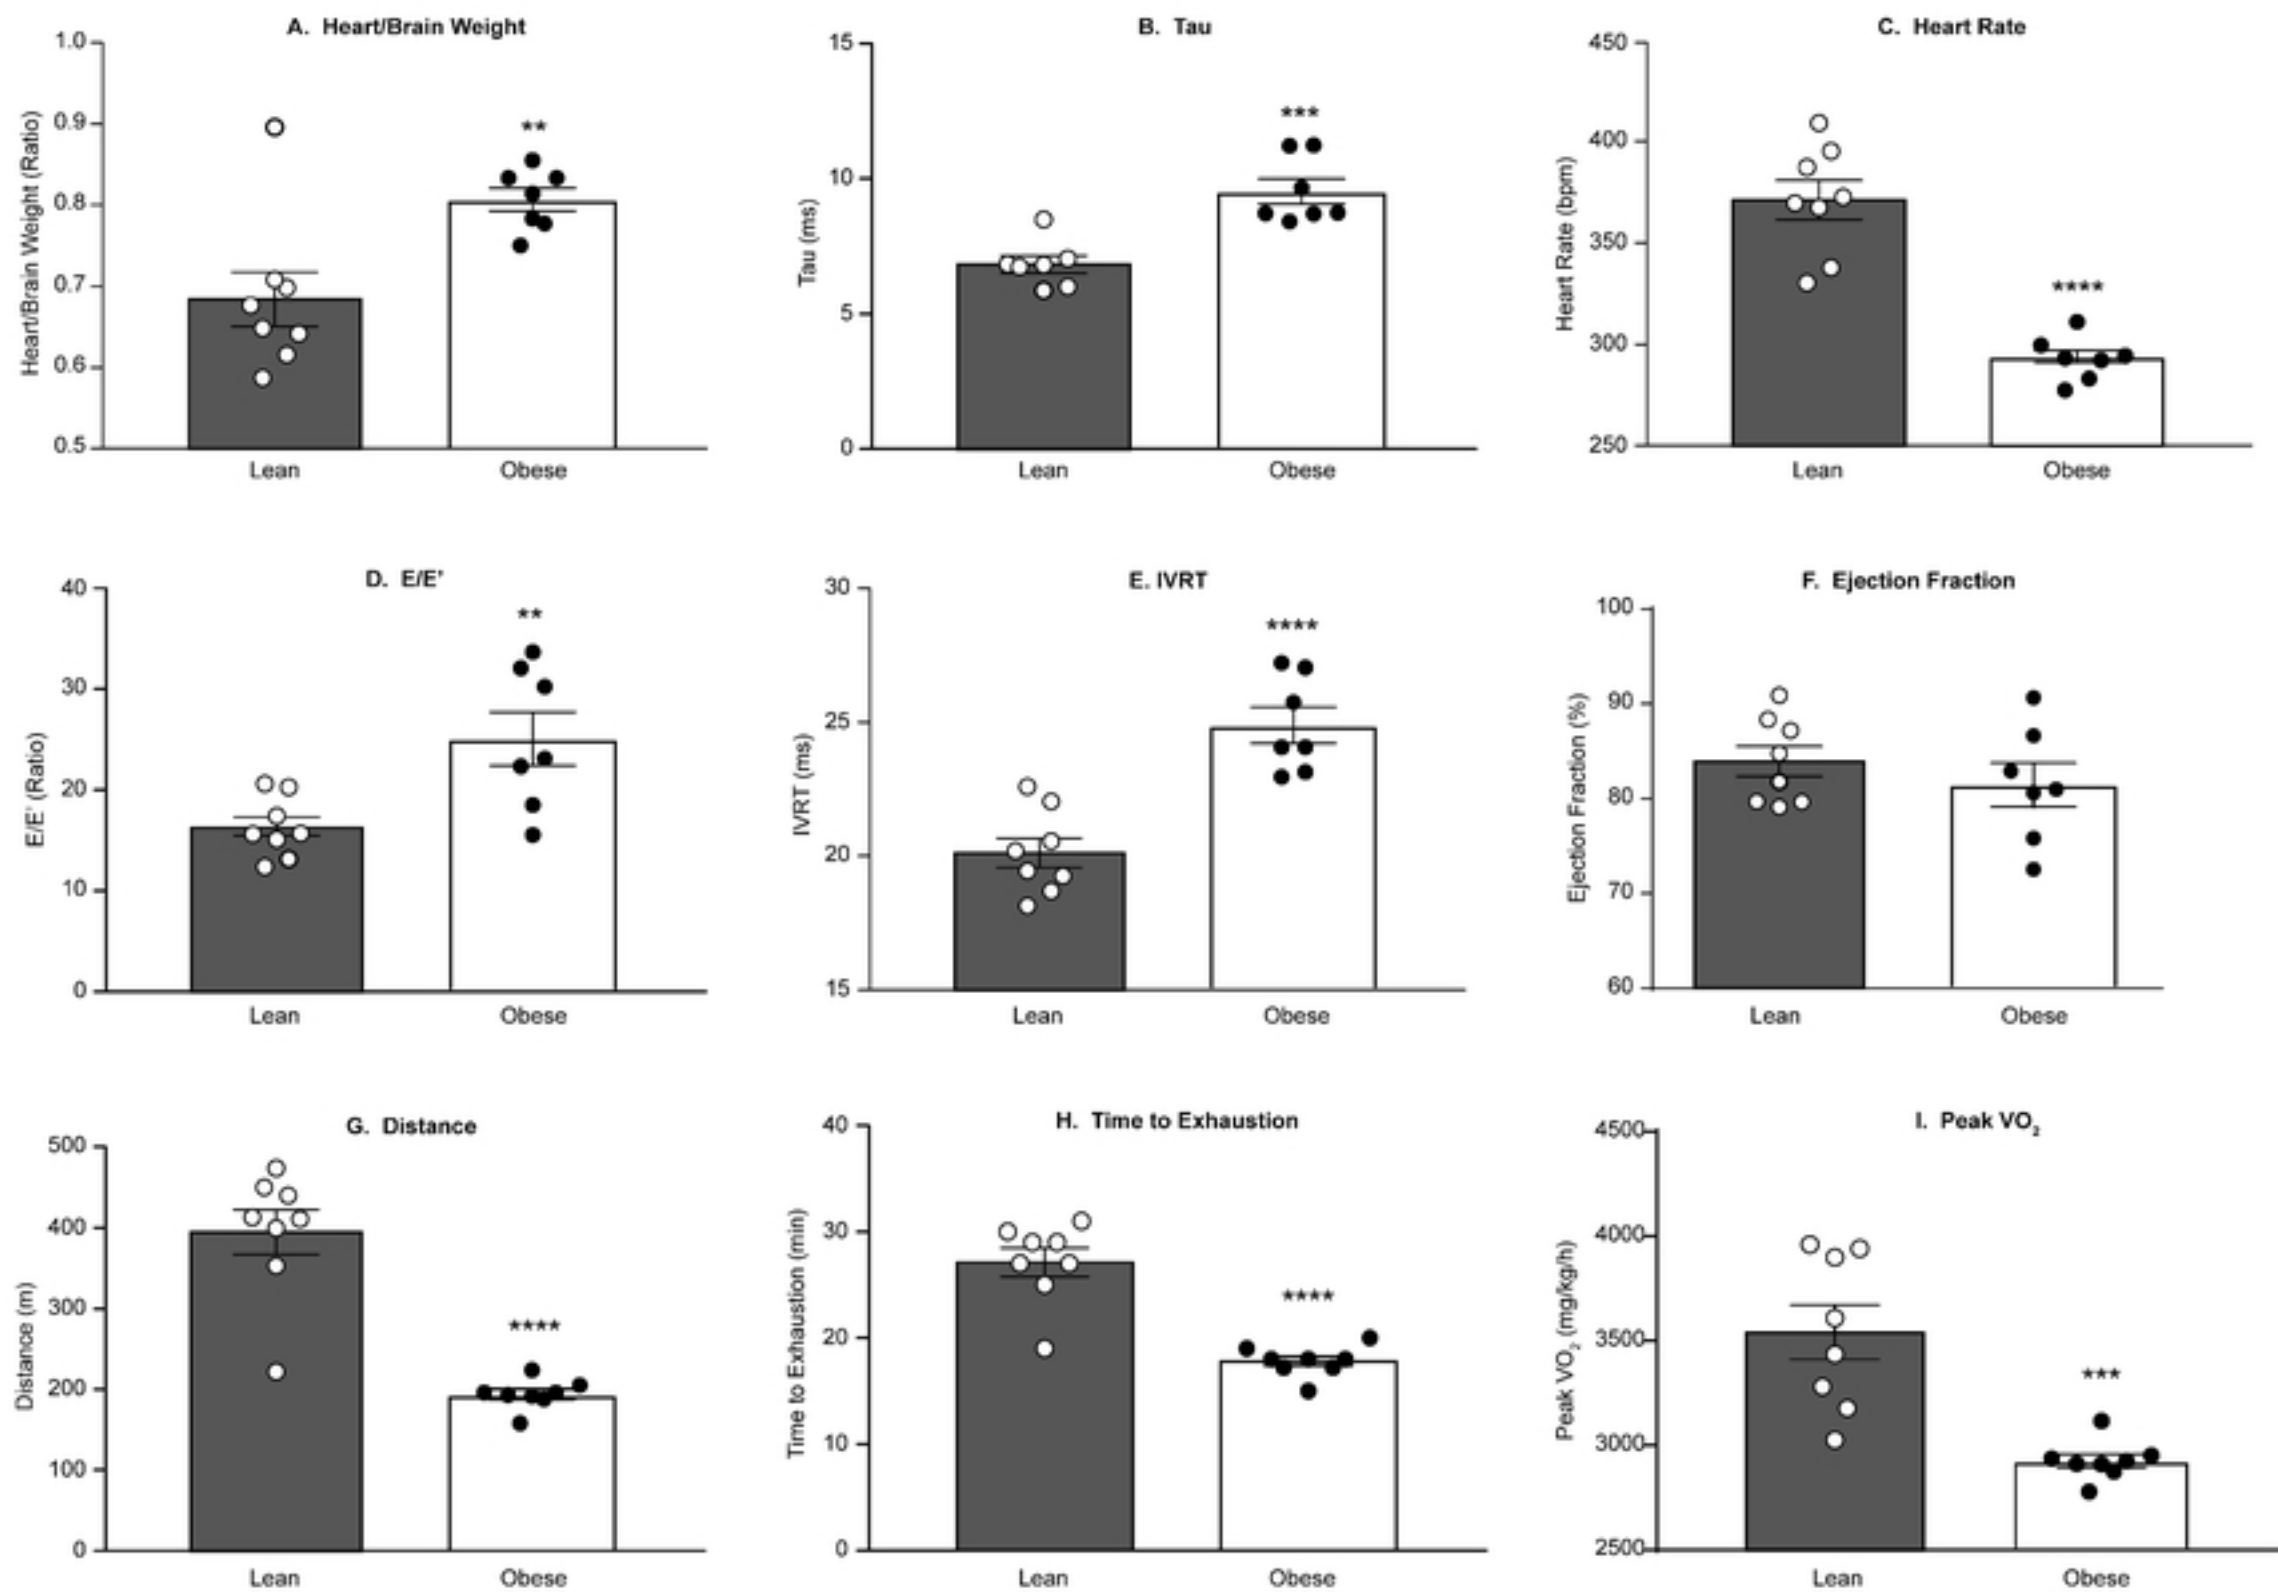

Figure 3

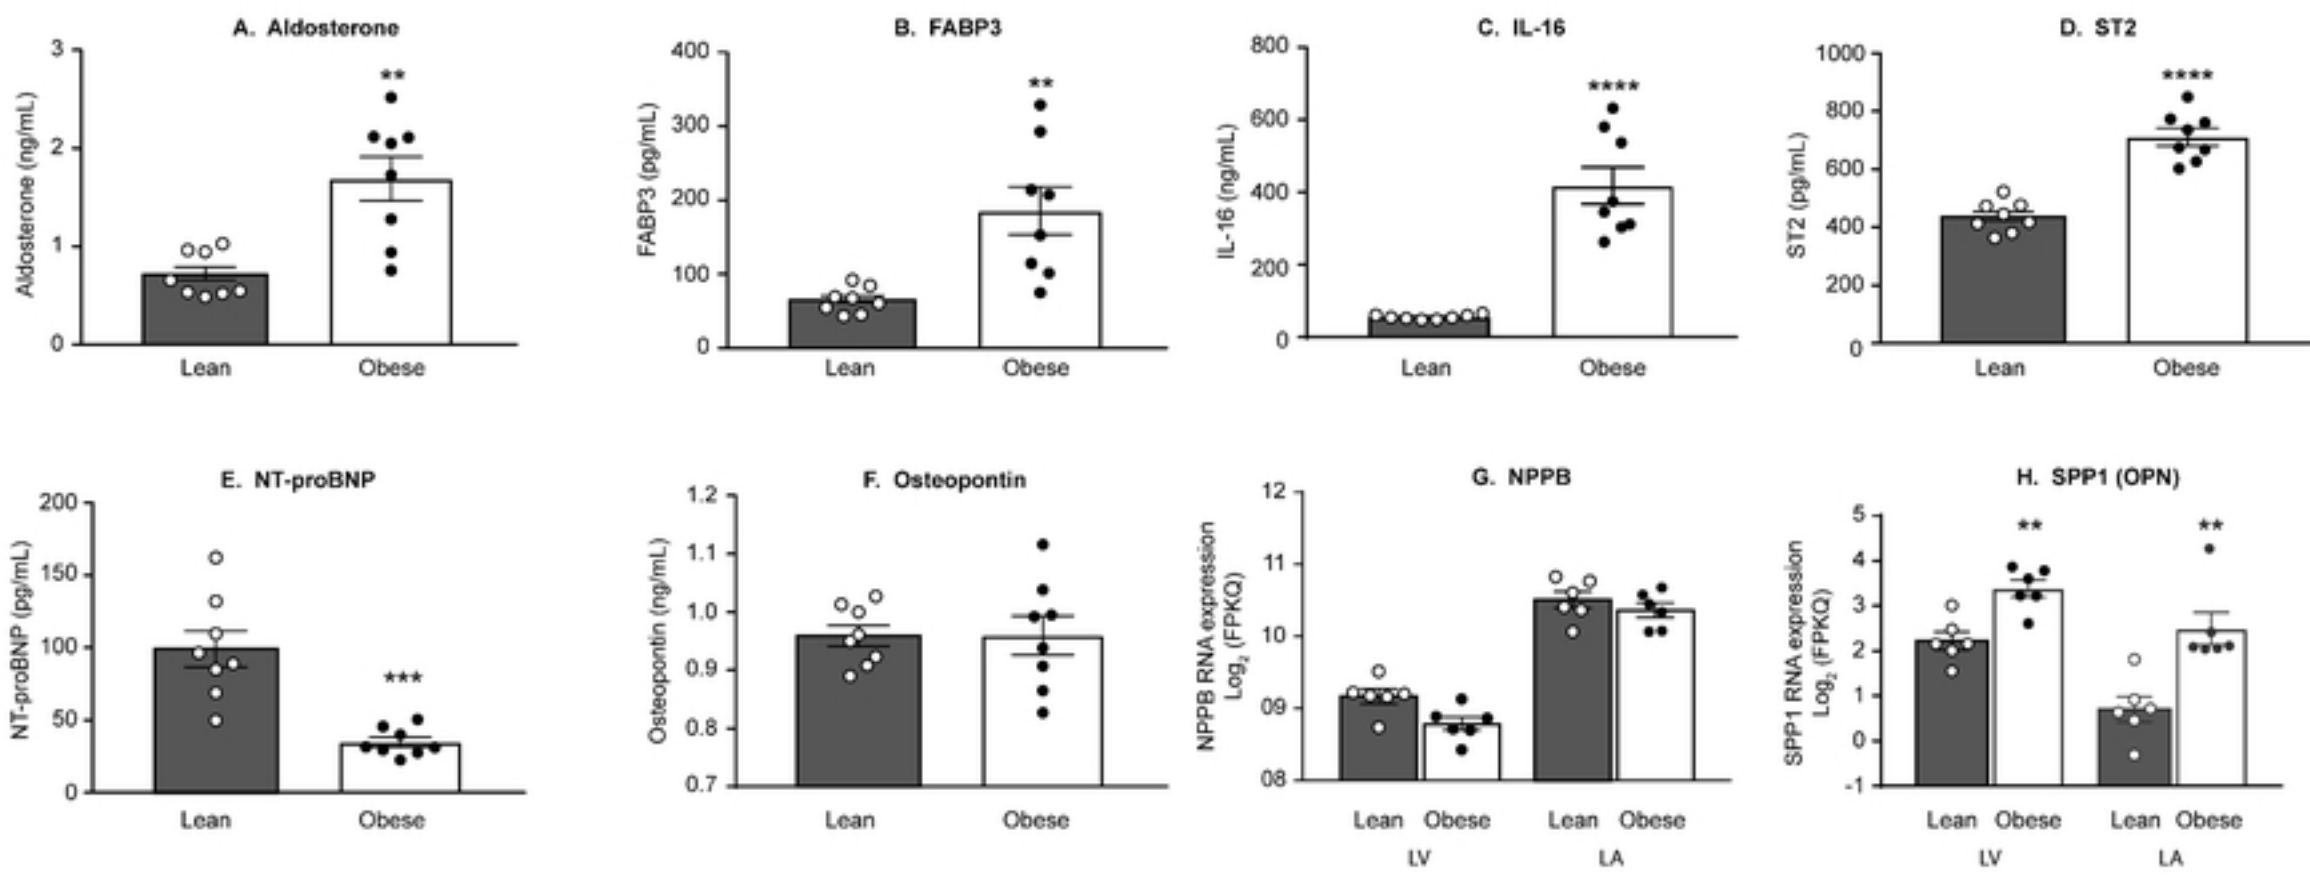

Figure 4



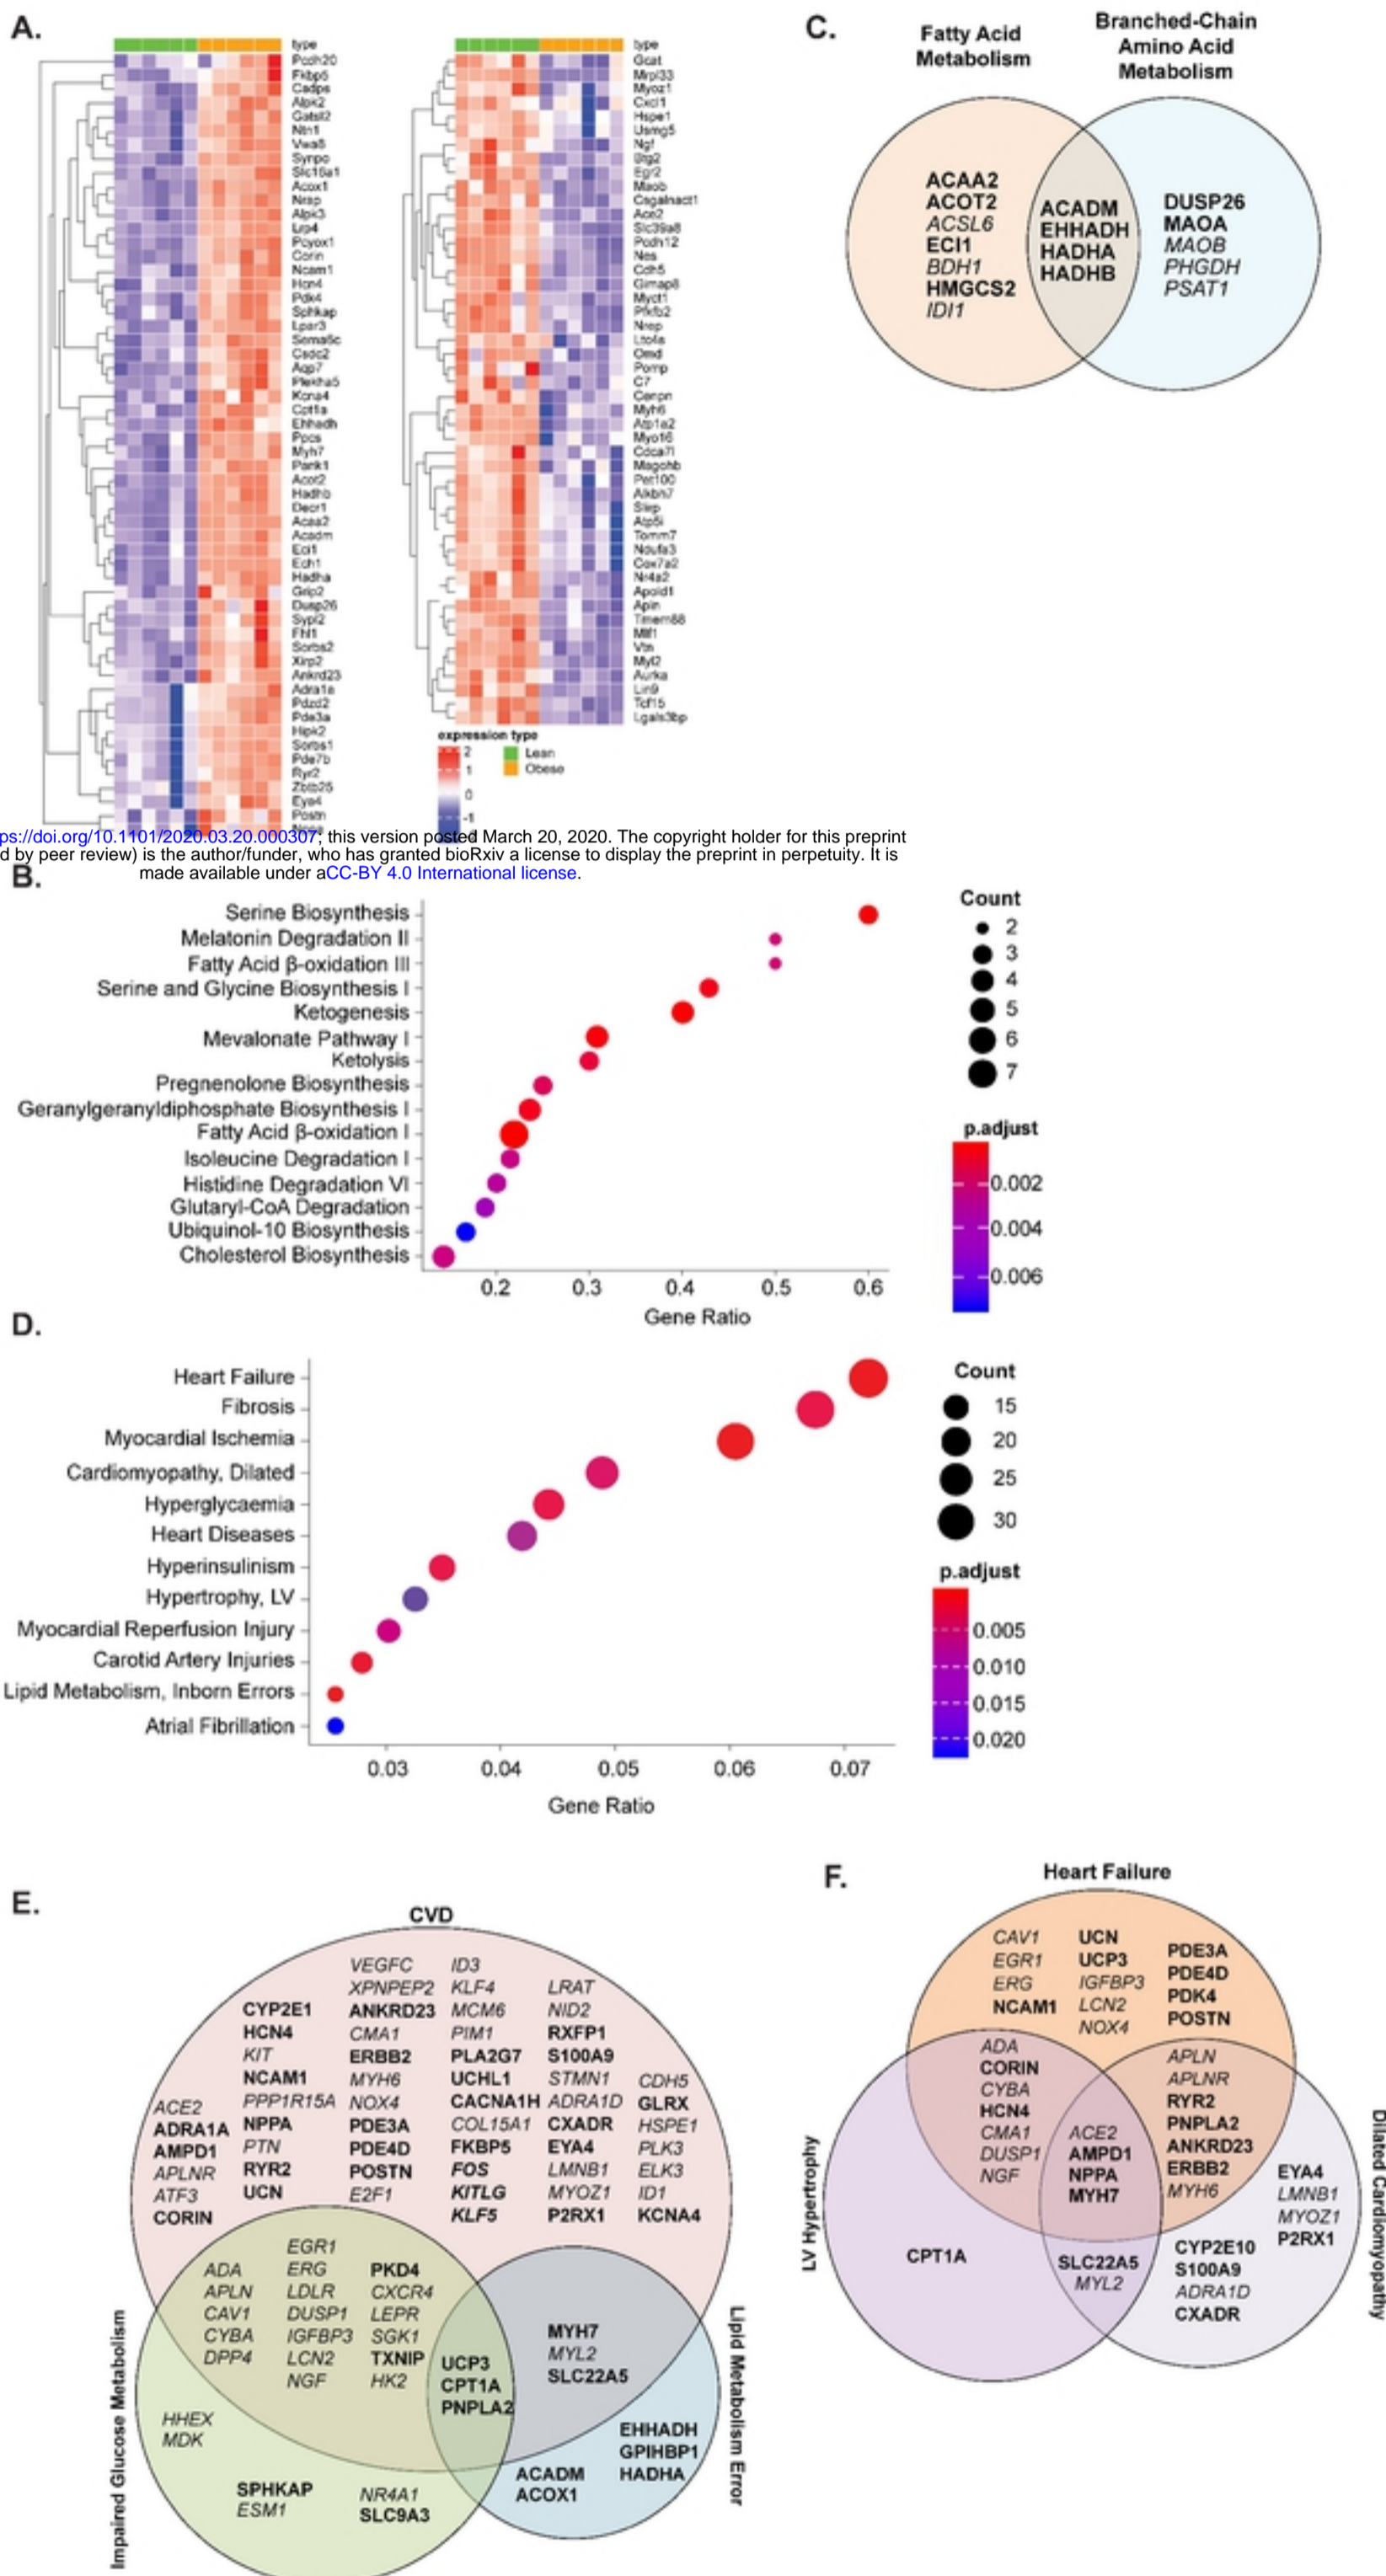

bioRxiv preprint doi: <https://doi.org/10.1101/2020.03.20.000307>; this version posted March 20, 2020. The copyright holder for this preprint (which was not certified by peer review) is the author/funder, who has granted bioRxiv a license to display the preprint in perpetuity. It is made available under aCC-BY 4.0 International license.

Figure 5

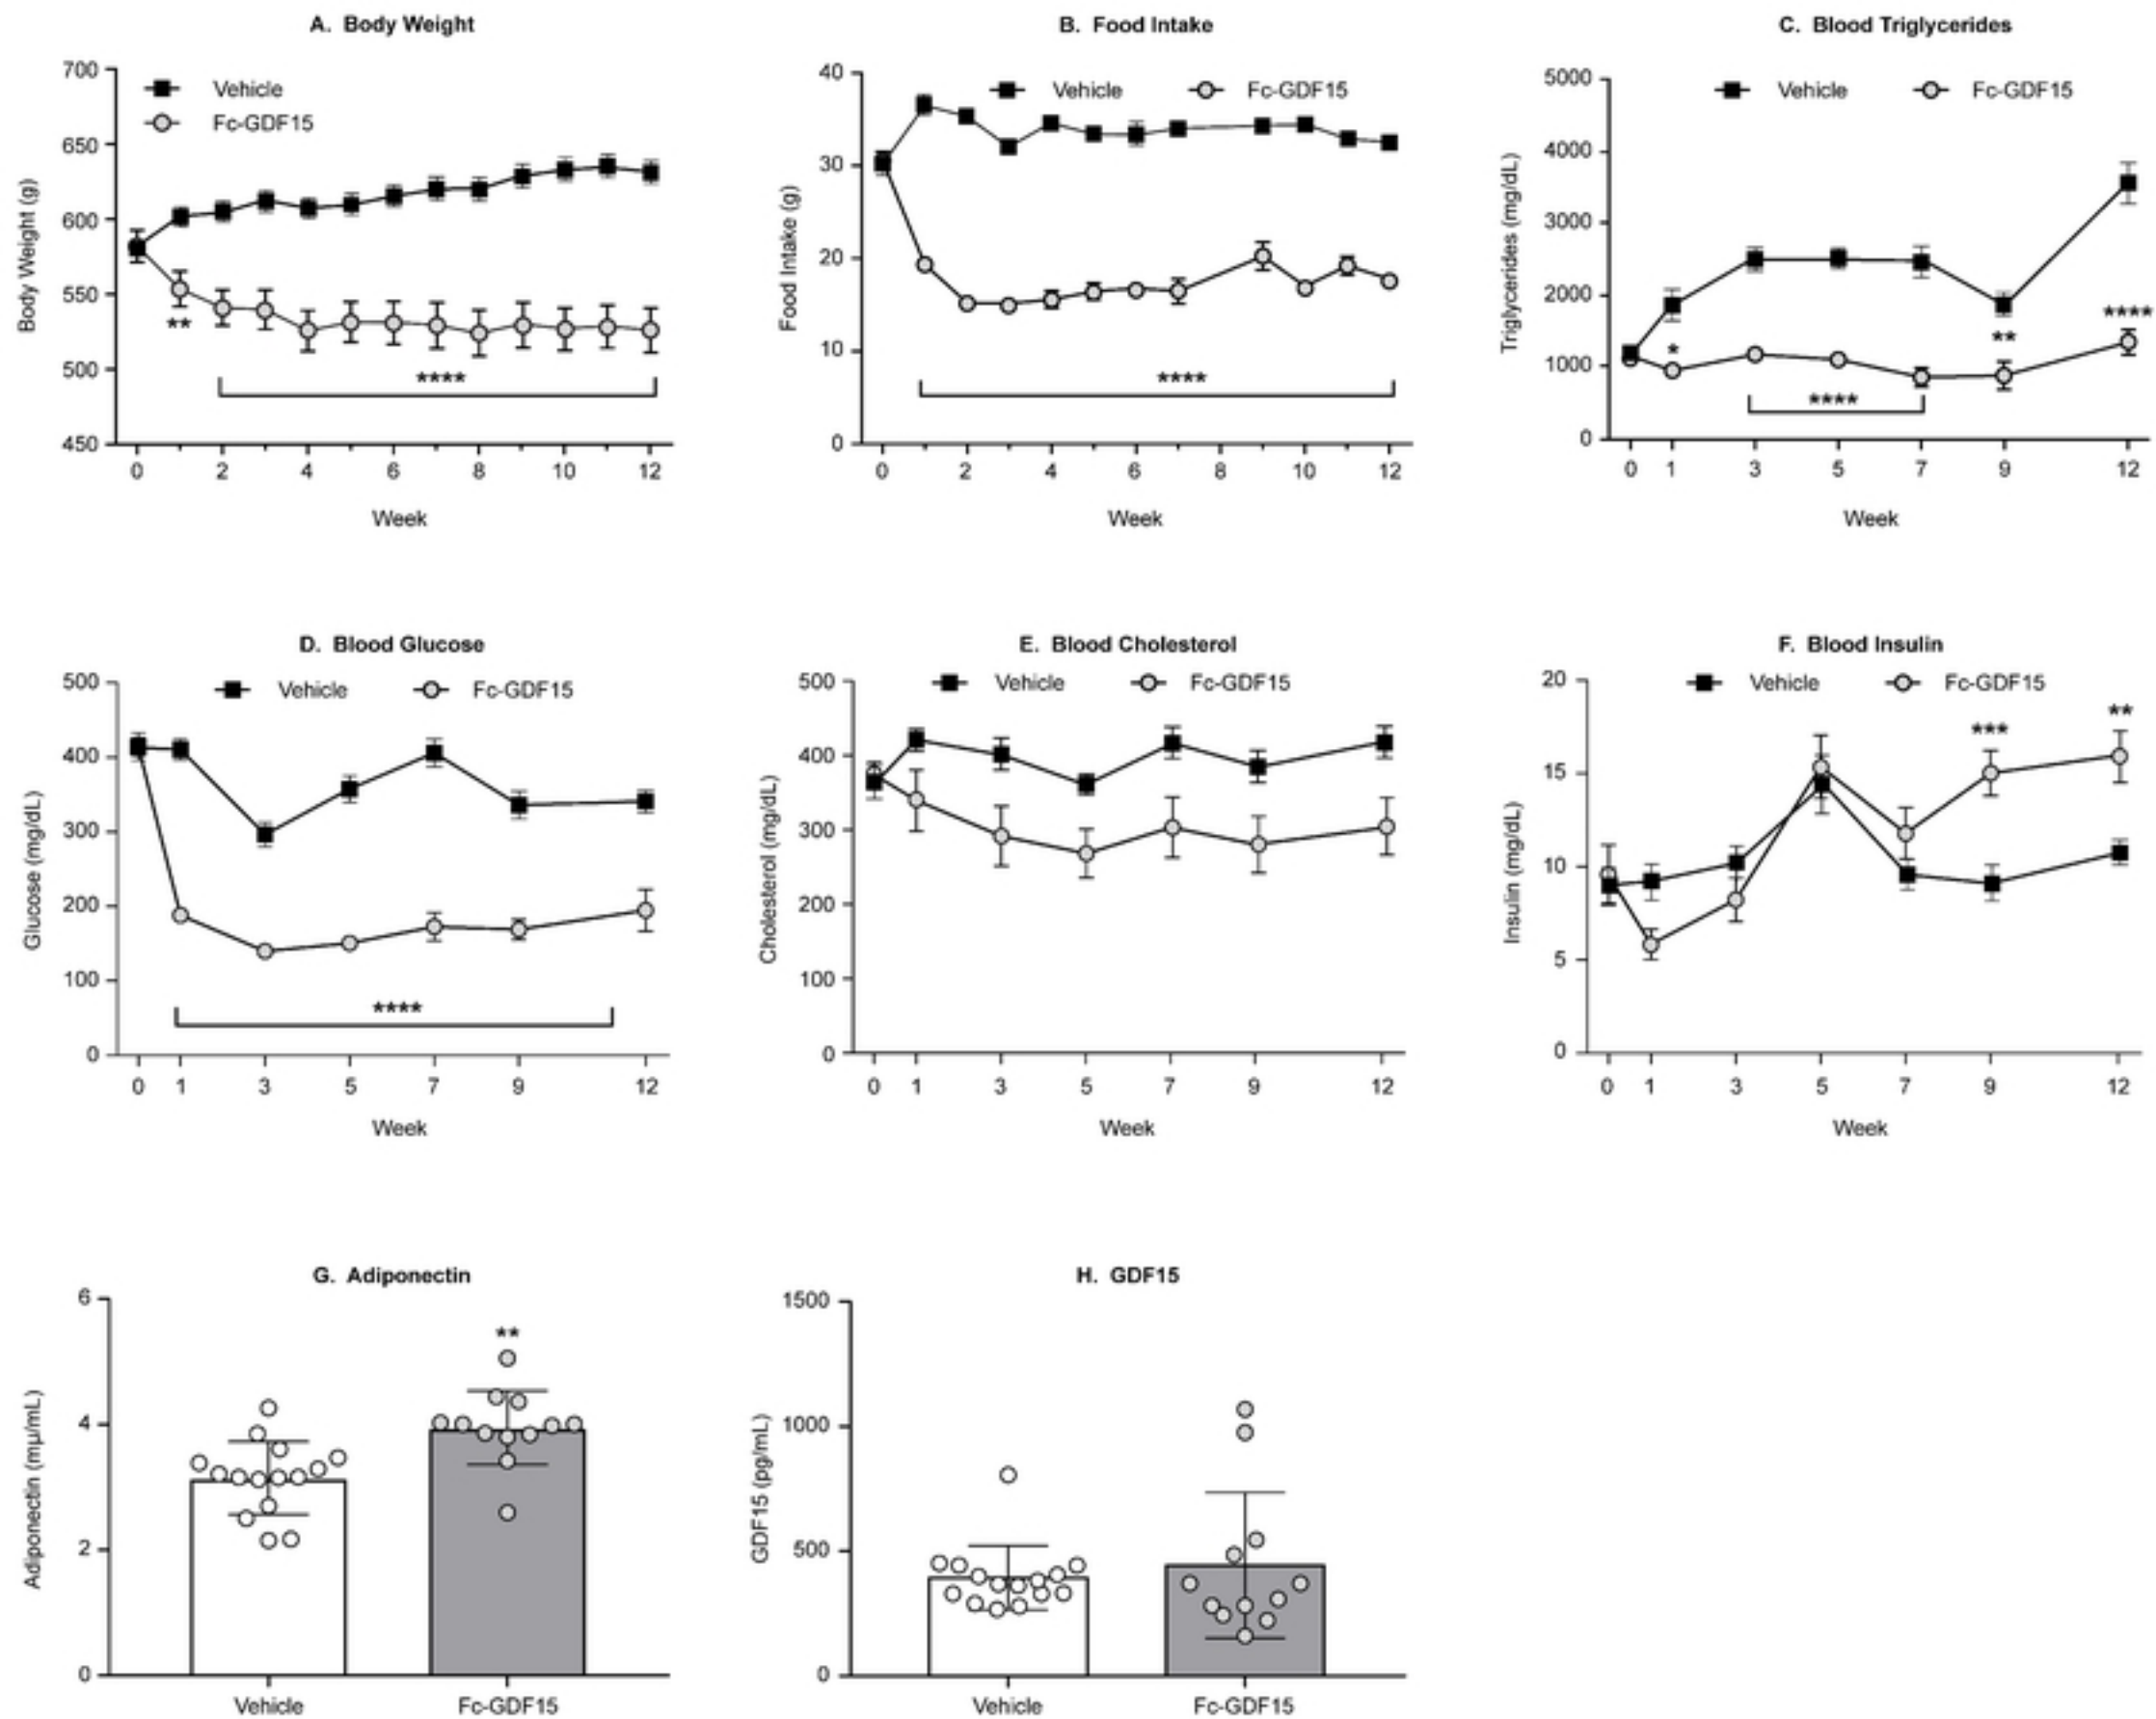

Figure 6

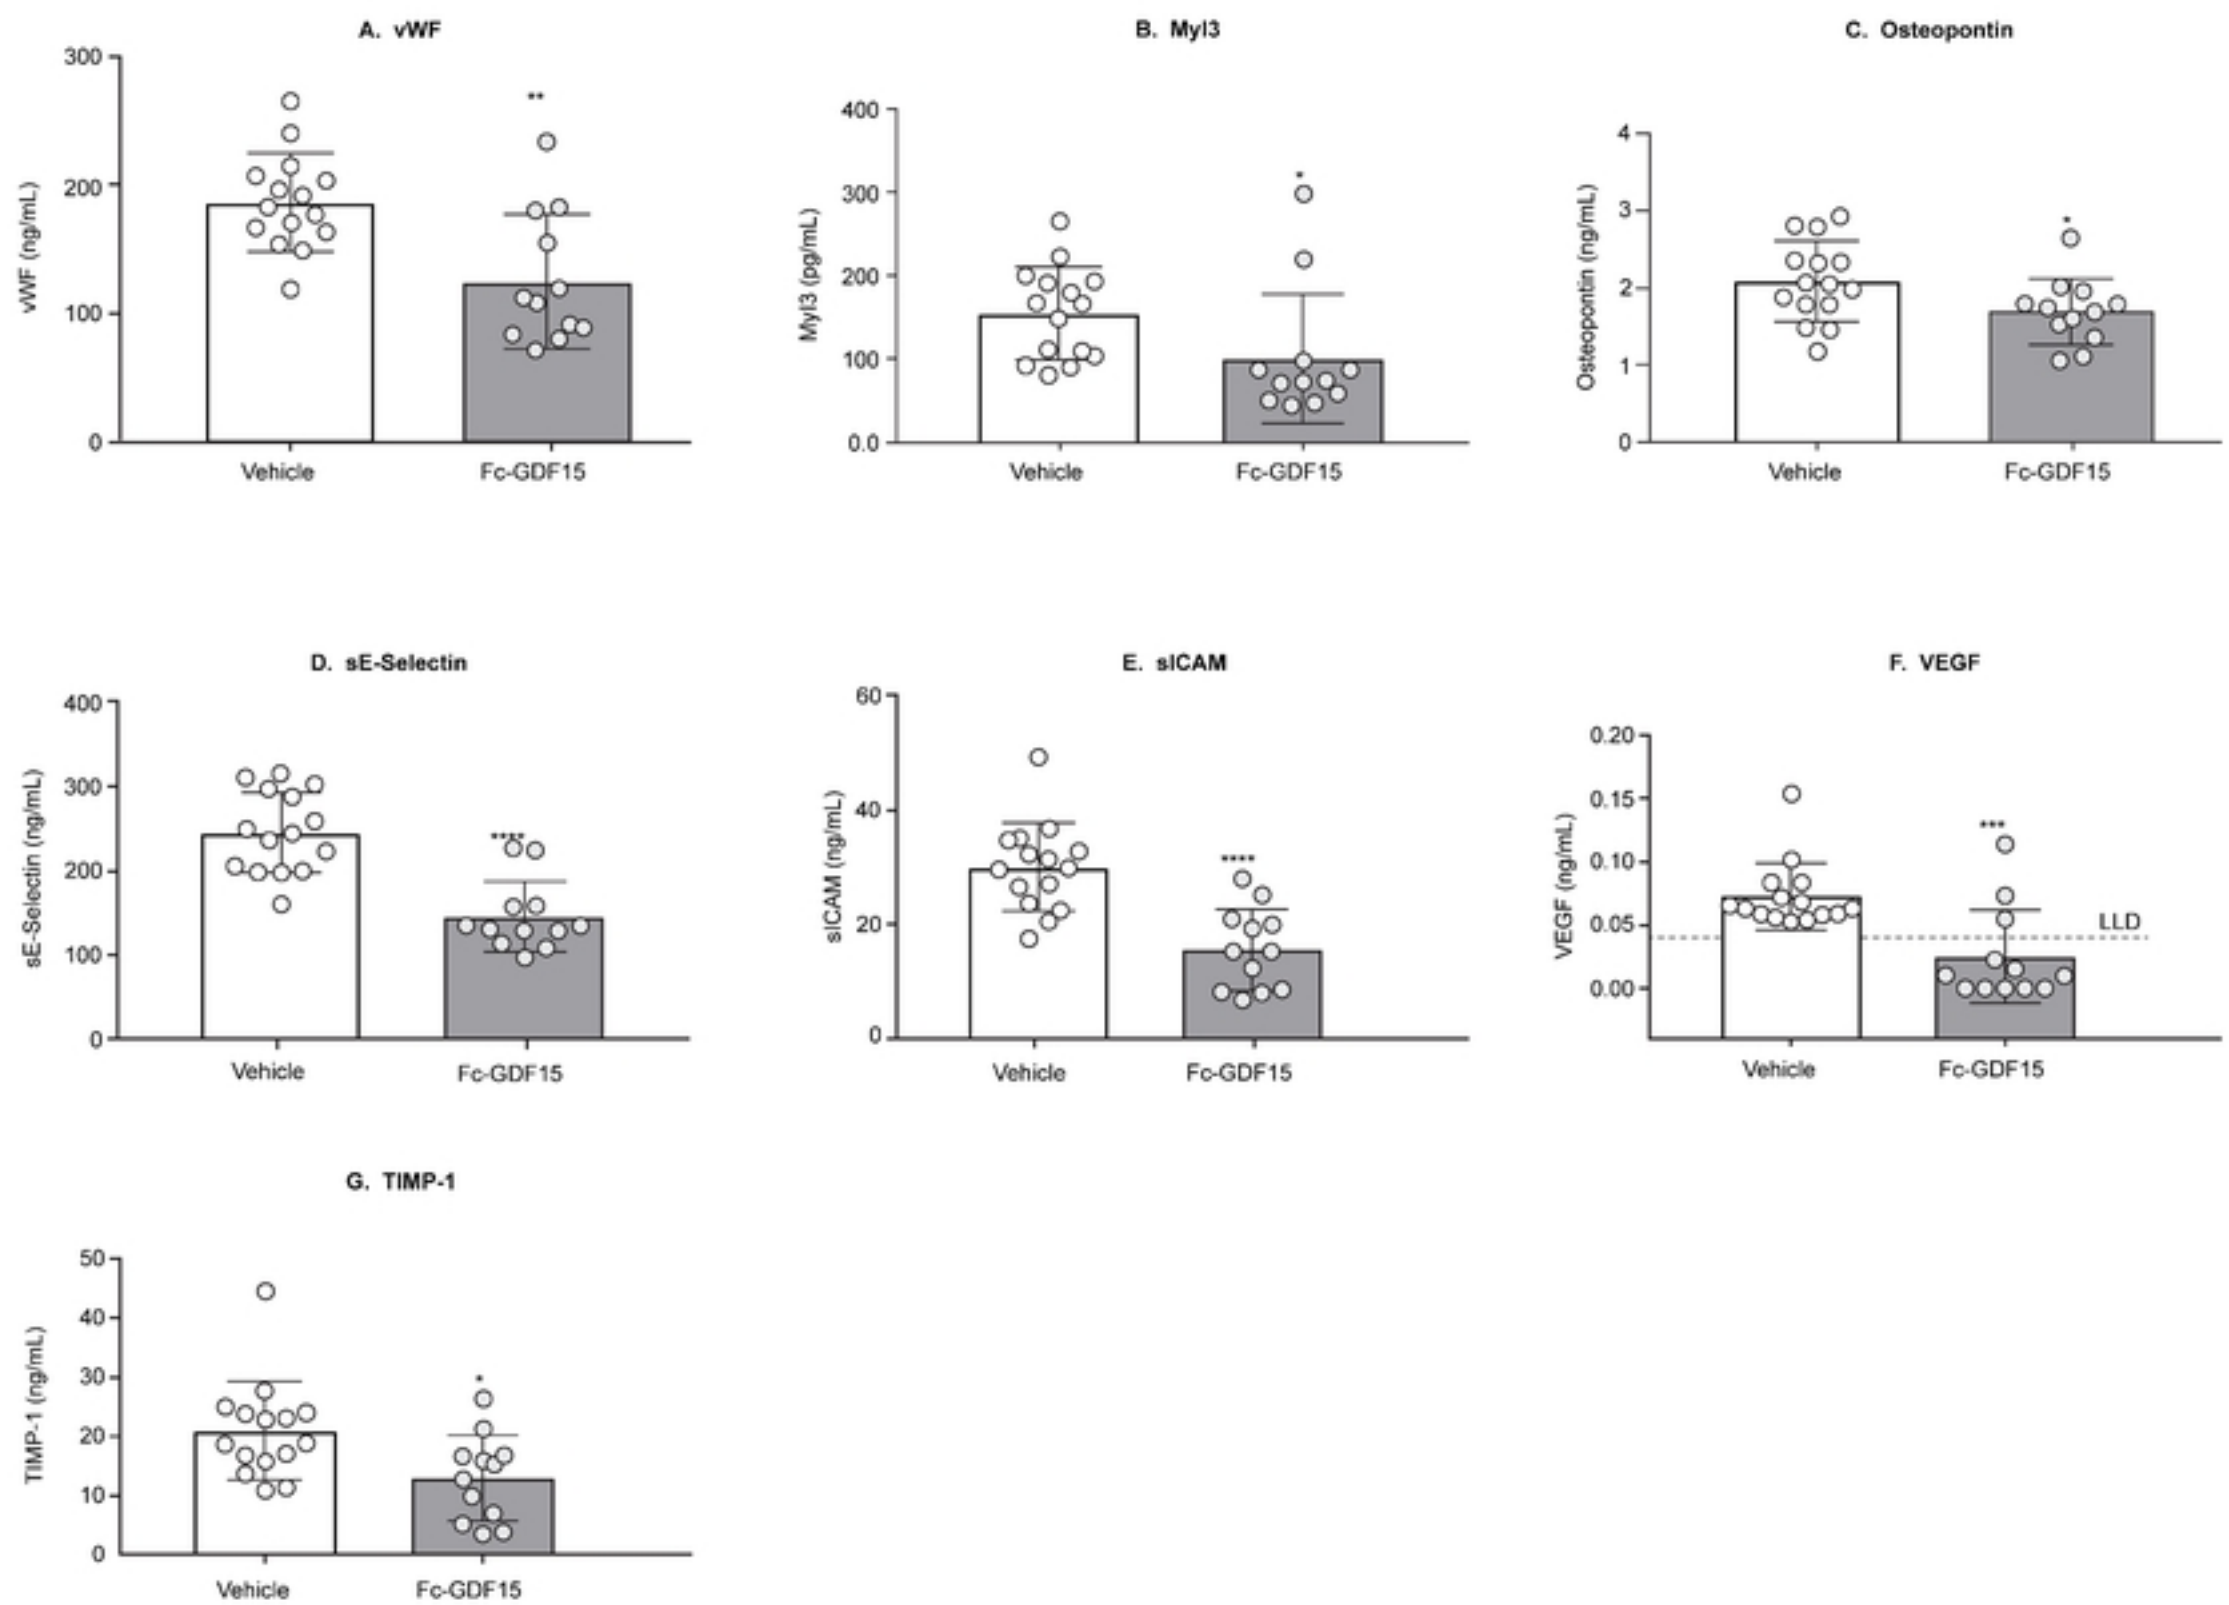

Figure 7

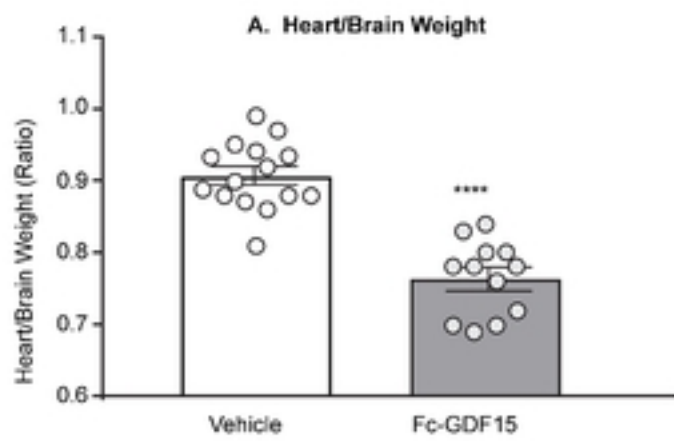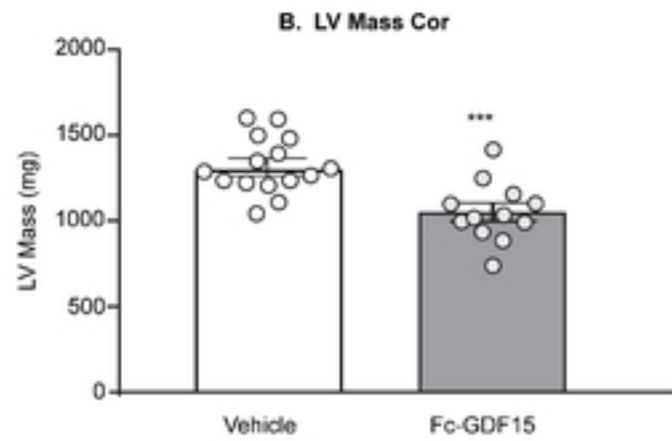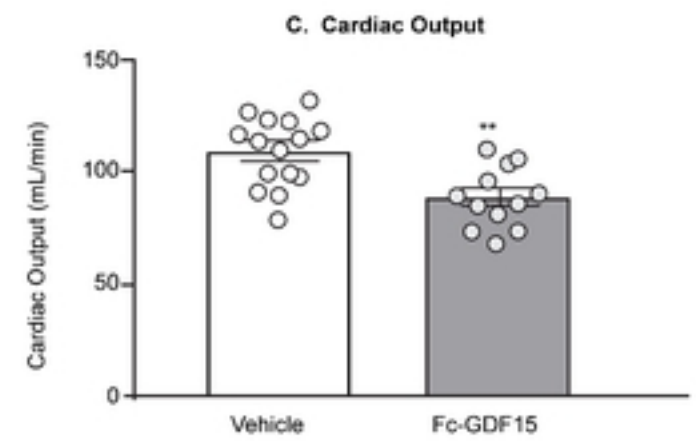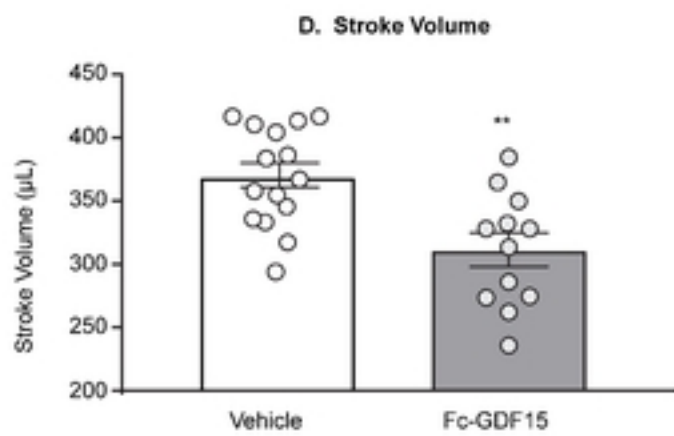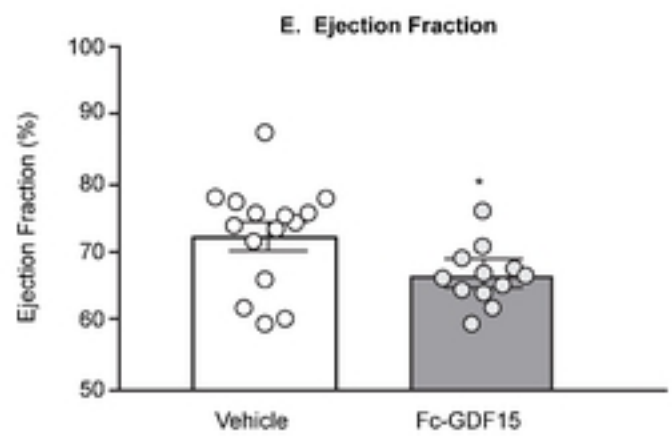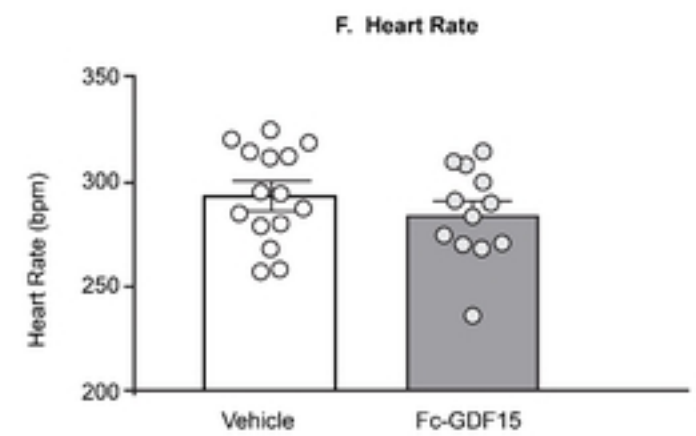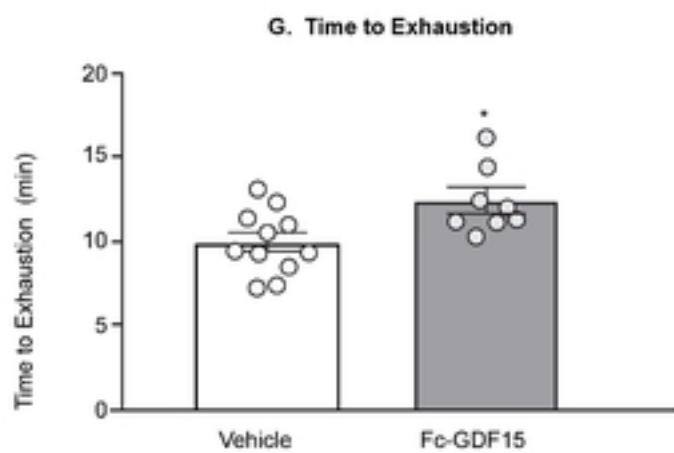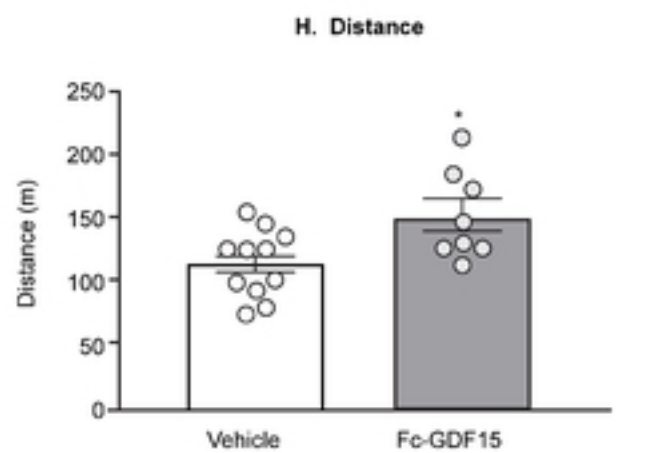

Figure 8
